# Supplementary material for: Seagrass contribution to blue carbon in a shallow karstic coastal area of the Gulf of Mexico
Source: PeerJ. 2021 Sep 10;9:e12109. doi: 10.7717/peerj.12109 (PMC8436957; doi:10.7717/peerj.12109)
Supplement: Supplemental Information 3 — These data were used for statistical analysis to compare depths. [file peerj-09-12109-s003.xlsx]

## Sheet: General
Region	Country	Location	Station	Lat	Lon	Water Depth	Tt AV gDwm2	Tt BW gDwm2	SfAV gDwm2	SfBW gDwm2	HwAV gDwm2	HwBw gDwm2	TtL	TtW	#Leave	SfL	HwL	TtD	SfD	HwD	TtvC	HwC	SfC	MaC	LAI	Temp	DO	SAL	NO3+NO2	NH4+	SRP	SRS	Cla	TRIX	Meadow	Corg Mgha TOP	Cing Mgha TOP	Corg %	Cing %
Gulf of Mexico	Mexico	RBLP	P1	20.3627	-90.4867	1	123.353	611.471	NA	NA	NA	NA	26.7	0.8	5	NA	NA	232	NA	NA	100	NA	NA	NA	2.4778	28	5	46	0.66	0.6	0.7	34.8	4.27	3.7	TTMA	394.3	40.7032	23.9474	2.03589
Gulf of Mexico	Mexico	RBLP	P2	19.9853	-90.4706	1	158.823	823.529	NA	NA	NA	NA	15	0.6	3	NA	NA	336	NA	NA	100	NA	NA	NA	0.9072	32	7	38	2.2	0.97	0.7	16.12	5.15	5	TTMA	782.219	418.687	24.7035	12.5765
Gulf of Mexico	Mexico	RBLP	P3	20.0789	-90.4859	1	NA	NA	NA	NA	NA	NA	NA	NA	NA	NA	NA	NA	NA	NA	50	NA	NA	50	NA	28	10	33	NA	NA	NA	NA	NA	NA	TTMA	700.403	129.433	11.3407	3.28708
Gulf of Mexico	Mexico	RBLP	P4	19.8998	-90.4937	1	86.5	1082.06	NA	NA	NA	NA	15.66	0.5	6	NA	NA	1235	NA	NA	50	NA	NA	NA	5.802	30	11	45	2.19	2.67	0.36	25.45	NA	NA	MIXTAMA	700.817	187.981	12.9702	3.27822
Gulf of Mexico	Mexico	RBLP	P5	19.9422	-90.5033	1	142.647	1006.76	NA	NA	NA	NA	44.1	1	5.4	NA	NA	252	NA	NA	100	NA	NA	55	6.0011	29	9	45	7.24	1.99	0.16	61.86	NA	NA	TTMA	280.367	49.9266	14.9935	2.57895
Gulf of Mexico	Mexico	RBLP	P6	19.9425	-90.5287	1	40.8824	281.765	NA	NA	NA	NA	16.5692	0.8	3.3	NA	NA	168	NA	NA	40	NA	NA	NA	0.6785	28	8	42	2.26	1.57	0.16	28.58	NA	NA	MIXTAMA	326.42	148.142	10.4247	3.21465
Gulf of Mexico	Mexico	RBLP	P7	20.5089	-90.4979	1	75	919.118	NA	NA	NA	NA	21.5	0.8	4	NA	NA	288	NA	NA	100	NA	NA	20	2.0805	31	7	41	1.16	0.24	0.22	8.1	2.51	3.9	MIXTAMA	250.989	80.6895	12.5124	2.54008
Gulf of Mexico	Mexico	RBLP	P8	19.9423	-90.4618	1	119.971	1392.65	NA	NA	NA	NA	24.8	0.9	3.7	NA	NA	224	NA	NA	80	NA	NA	30	1.8332	28	12	40	1.02	1.6	0.35	61.45	1.91	3.83	MIXTAMA	435.041	102.506	16.0126	2.36772
Gulf of Mexico	Mexico	RBLP	P9	20.0489	-90.4853	1	17.6471	29.4118	NA	NA	NA	NA	20	0.9	3.3	NA	NA	952	NA	NA	55	15	NA	NA	5.3947	28	9	43	2.25	1.37	0.18	75.13	3.22	4.5	MIXTAMA	299.553	29.7648	28.6707	2.29178
Gulf of Mexico	Mexico	RBLP	P10	20.1363	-90.4901	2	252.941	1647.06	NA	NA	NA	NA	59.45	1.1	5.7	NA	NA	382	NA	NA	100	NA	NA	50	14.1558	28	3	43	19.24	1.82	0.24	7.56	NA	NA	TTMA	572.443	120.271	19.1255	3.88281
Gulf of Mexico	Mexico	RBLP	P11	20.3639	-90.5009	2	139.853	870.882	NA	NA	NA	NA	38.9286	0.7	4.8	NA	NA	612	NA	NA	95	NA	NA	NA	8.0606	28	3	43	NA	0.76	0.42	29.85	1.17	NA	TTMA	34.1857	15.2757	7.89291	3.03909
Gulf of Mexico	Mexico	RBLP	P12	20.136	-90.4767	2	172.941	598.235	NA	NA	NA	NA	67.5	0.7	4	13	NA	764	NA	NA	100	NA	NA	10	14.4396	28	5	42	NA	0.47	0.51	7.44	1	3	MIXTAMA	572.443	120.271	19.1255	3.88281
Gulf of Mexico	Mexico	RBLP	P13	20.0603	-90.5058	2	317.647	470.588	NA	NA	NA	NA	32.6667	0.6	4	NA	NA	764	NA	NA	80	NA	NA	15	5.9898	29	7	43	0.37	0.37	0.1	5.88	1.99	1.9	TTMA	123.261	15.5071	19.2537	1.77877
Gulf of Mexico	Mexico	RBLP	P14	19.9276	-90.4772	2	400	1582.35	NA	NA	NA	NA	27	0.6	4	NA	NA	164	NA	NA	50	NA	NA	NA	1.0627	29	7	43	9	0.71	0.58	12.54	1.3	4.3	MIXTAMA	186.528	79.8036	6.50149	2.51601
Gulf of Mexico	Mexico	RBLP	P15	20.4486	-90.503	2	169.706	749.118	NA	NA	NA	NA	61	0.9	5	NA	NA	441	NA	NA	90	10	NA	NA	12.1055	30	7	41	2.08	1.55	0.3	23.6	NA	NA	MIXTAMA	89.7123	31.3633	10.7872	2.88277
Gulf of Mexico	Mexico	RBLP	P16	19.899	-90.4996	2	393.412	1139.71	NA	NA	NA	NA	81.2	1.4	5.7	NA	NA	252	NA	NA	100	NA	NA	NA	15.6537	28	9	45	4.12	1.8	0.36	13.82	NA	NA	TTMA	700.187	319.491	10.5469	3.4275
Gulf of Mexico	Mexico	RBLP	P17	20.449	-90.529	2	54.7059	1152.94	46.18	964	NA	NA	34	1.1	4	26.5	NA	532	560	NA	70	NA	30	40	7.9587	30	7	40	2.32	1.93	0.3	3.88	NA	NA	MIXTAMA	46.3956	15.8287	11.7593	3.3357
Gulf of Mexico	Mexico	RBLP	P18	20.2329	-90.5283	2	10	344.118	NA	NA	NA	NA	18	0.7	4	NA	NA	112	NA	NA	20	NA	NA	NA	0.5645	28	7	39	1.55	0.79	0.3	9.44	NA	NA	TTMA	436.416	245.662	8.80285	4.76465
Gulf of Mexico	Mexico	RBLP	P19	20.0464	-90.4896	2	163.529	224.118	55	250	NA	NA	65.3571	0.9	5.3	NA	NA	375	NA	NA	100	NA	30	20	11.3908	28	6	40	1.75	1.14	0.26	7.19	11.65	5	MIXTAMA	406.601	119.662	11.6992	3.00412
Gulf of Mexico	Mexico	RBLP	P20	20.3665	-90.5466	2	26.5441	195.956	34.81	185.26	NA	NA	29.25	0.9	4.5	18	NA	252	1029	NA	20	NA	75	NA	2.8194	30	9	40	1.08	0.18	0.13	5.84	1.5	3.4	MIXTAMA	336.112	181.999	9.48879	4.34371
Gulf of Mexico	Mexico	RBLP	P21	20.5064	-90.5058	2	220.588	585.882	NA	NA	NA	NA	40.1667	0.9	3.7	NA	NA	416	NA	NA	95	NA	NA	NA	5.2077	28	8	43	0.98	0.19	0.6	14.63	1.36	3.2	TTMA	444.513	200.211	14.3627	6.46735
Gulf of Mexico	Mexico	RBLP	P22	19.9892	-90.4731	2	560.882	1195	NA	NA	NA	NA	35.624	0.9	5	NA	NA	840	NA	NA	100	NA	NA	NA	13.3581	31	8	45	16.66	2.11	0.3	48.23	NA	NA	MIXTAMA	619.239	316.904	9.02447	3.93718
Gulf of Mexico	Mexico	RBLP	P23	20.0441	-90.535	2	53.8235	547.059	NA	NA	NA	NA	21.85	0.8	3.5	NA	NA	448	NA	NA	70	NA	NA	40	2.7409	27	8	45	1.41	3.49	0.21	19.84	NA	NA	MIXTAMA	254.552	105.086	9.38942	4.01326
Gulf of Mexico	Mexico	RBLP	P24	20.1363	-90.5105	2	9.4118	70.2941	NA	NA	NA	NA	15.25	0.8	4	NA	NA	168	NA	NA	20	NA	NA	NA	0.7686	27	7	40	19.14	1.36	0.12	29.48	NA	NA	MIXTAMA	116.392	65.1644	7.79748	3.92419
Gulf of Mexico	Mexico	RBLP	P25	19.9896	-90.5054	3	97.3529	612.647	NA	NA	NA	NA	21.85	0.8	4.5	NA	NA	588	NA	NA	90	NA	NA	20	4.6252	30	6	42	23.71	2.28	0.37	26.33	NA	NA	TTMA	NA	NA	NA	NA
Gulf of Mexico	Mexico	RBLP	P26	20.0959	-90.483	3	35.2941	61.7647	NA	NA	NA	NA	23.35	0.8	5.5	NA	NA	476	NA	NA	15	NA	NA	NA	4.5848	28	7	45	4.49	2.44	0.22	82.95	NA	NA	MIXTAMA	NA	NA	NA	NA
Gulf of Mexico	Mexico	RBLP	P27	20.5106	-90.5866	3	55.8824	21.7647	18.44	91.16	NA	NA	33	0.3	6	42	NA	58	126	NA	20	NA	40	10	0.3445	30	8	38	24.08	2.26	0.17	11.85	NA	NA	MIXTASF	NA	NA	NA	NA
Gulf of Mexico	Mexico	RBLP	P28	20.0961	-90.4964	3	27.3529	297.059	25	200	NA	NA	24.25	0.6	4	NA	NA	205	NA	NA	NA	NA	30	NA	1.1931	30	7	45	1.93	1.63	0.16	42.77	NA	NA	TTMA	350.75	110.294	9.40533	2.65967
Gulf of Mexico	Mexico	RBLP	P29	20.5098	-90.5132	3	31.7647	188.235	64.7059	300	23.5294	100	39.3	0.9	3.7	42	NA	235	588	823	40	NA	30	20	3.0477	30	9	40	3.37	1.82	0.12	9.37	NA	NA	MIXTAMA	540.485	263.555	8.50846	4.11994
Gulf of Mexico	Mexico	RBLP	P30	19.9904	-90.5296	3	43.2353	826.471	NA	NA	NA	NA	35.15	1	3	NA	NA	352	NA	NA	20	NA	NA	5	3.7118	30	7	42	1.23	1.52	0.16	3.92	NA	NA	MIXTAMA	NA	NA	NA	NA
Gulf of Mexico	Mexico	RBLP	P31	19.9419	-90.4916	3	40.8824	447.059	NA	NA	NA	NA	30	0.9	3	29	NA	168	NA	NA	15	NA	NA	15	1.2852	29	7	45	7.39	2.74	0.42	68	NA	NA	MIXTAMA	450.293	185.754	8.35854	4.16784
Gulf of Mexico	Mexico	RBLP	P32	19.9905	-90.4967	3	37.3529	602.647	NA	NA	NA	NA	27.85	0.8	3	NA	NA	294	NA	NA	30	NA	NA	40	1.9651	30	6	40	16.71	2.33	0.21	25.96	NA	NA	TTMA	72.1579	39.8457	7.57911	3.55347
Gulf of Mexico	Mexico	RBLP	P33	19.9911	-90.5181	3	53.5294	494.118	NA	NA	NA	NA	44.25	0.9	4	NA	NA	352	NA	NA	40	NA	NA	10	5.6074	29	7	42	16.53	1.47	0.53	21.26	NA	NA	TTMA	478.482	276.74	7.93207	4.51543
Gulf of Mexico	Mexico	RBLP	P34	19.8995	-90.5189	3	25.5882	212.647	NA	NA	NA	NA	18.67	0.5	4	NA	NA	794	NA	NA	30	NA	NA	10	3.202	28	8	46	1.57	1.58	0.3	63.24	NA	NA	TTMA	265.44	97.2192	10.2272	3.71278
Gulf of Mexico	Mexico	RBLP	P35	19.9681	-90.5422	3	32.6471	888.235	NA	NA	NA	NA	31	0.9	3	NA	NA	235	NA	NA	40	NA	NA	15	1.9451	29	7	42	NA	NA	NA	NA	NA	NA	TTMA	NA	NA	NA	NA
Gulf of Mexico	Mexico	RBLP	P36	19.9906	-90.4826	3	25.2941	223.529	NA	NA	NA	NA	26.15	0.9	4	NA	NA	129	NA	NA	100	NA	NA	30	1.2144	30	7	42	0.96	1.72	0.3	42.59	NA	NA	MIXTASF	NA	NA	NA	NA
Gulf of Mexico	Mexico	RBLP	P37	19.9896	-90.4882	3	135	794.118	NA	NA	NA	NA	24.25	0.9	5	NA	NA	558	NA	NA	90	NA	NA	10	6.0892	30	7	44	1.54	2.15	0.3	22.98	NA	NA	TTMA	NA	NA	NA	NA
Gulf of Mexico	Mexico	RBLP	P38	19.9424	-90.5203	3	24.7059	352.647	NA	NA	NA	NA	23.25	0.9	4	NA	NA	294	NA	NA	30	NA	NA	NA	2.4608	28	8	42	1.58	1.36	0.53	37.11	NA	NA	TTMA	423.542	178.371	8.19218	3.39634
Gulf of Mexico	Mexico	RBLP	P39	19.9367	-90.5079	3	250	1050	NA	NA	NA	NA	49.6756	0.9	4.6	21	NA	432	NA	NA	100	NA	NA	10	8.657	28	6	40	1.71	0.89	0.11	28.55	0.5	3.14	MIXTAMA	226.065	108.924	8.99428	3.83947
Gulf of Mexico	Mexico	RBLP	P40	19.9552	-90.5397	3	279.412	502.941	NA	NA	NA	NA	22.2556	0.8	4	32	NA	294	NA	NA	70	NA	20	10	2.0938	30	7	37	0.56	0.6	NA	6.7	2.14	0.15	MIXTAMA	NA	NA	NA	NA
Gulf of Mexico	Mexico	RBLP	P41	20.0965	-90.5144	3	133.823	517.647	NA	NA	NA	NA	39.75	1	5	NA	NA	441	NA	NA	80	NA	NA	NA	8.7649	28	8	43	18.08	1.45	0.25	24.6	NA	NA	TTMA	NA	NA	NA	NA
Gulf of Mexico	Mexico	RBLP	P42	20.0981	-90.6091	3	NA	NA	129.412	435.294	NA	NA	NA	NA	NA	53	NA	NA	135.294	NA	NA	NA	100	10	NA	34	7	40	26.14	1.4	0.47	5.59	NA	NA	SFTT	68.6283	25.0622	8.5501	3.1399
Gulf of Mexico	Mexico	RBLP	P43	19.9001	-90.5125	3	31.5686	101.961	64.7059	129.412	NA	NA	28.85	0.8	6	36	NA	580	264.706	NA	40	NA	NA	10	8.0318	29	8	46	3.03	3.14	0.15	82.43	NA	NA	MIXTAMA	384.57	127.261	8.39298	2.95494
Gulf of Mexico	Mexico	RBLP	P44	19.9428	-90.5379	3	132.353	911.765	NA	NA	NA	NA	38.5	0.9	4	NA	NA	529	NA	NA	60	NA	NA	20	7.3319	29	8	42	2.92	0.95	0.32	26.28	NA	NA	TTMA	689.597	283.449	9.37095	3.4545
Gulf of Mexico	Mexico	RBLP	P45	19.9903	-90.5569	3	50.8824	288.235	33.5294	87.6471	NA	NA	25.95	1.5	4.7	18	NA	176	235	NA	30	NA	100	30	3.197	30	7	41	14.69	1.55	0.26	19.73	NA	NA	SFTT	354.187	196.81	7.64849	4.01401
Gulf of Mexico	Mexico	RBLP	P46	20.1388	-90.5513	3	NA	98.2353	NA	NA	NA	NA	NA	NA	NA	NA	NA	NA	NA	NA	20	NA	100	NA	NA	27	7	40	1.66	1.35	0.17	6.62	NA	NA	TTMA	NA	NA	NA	NA
Gulf of Mexico	Mexico	RBLP	P47	20.4493	-90.5508	3	10	70.5882	8.8235	50	NA	NA	25	0.6	3	NA	NA	58	205	NA	30	NA	20	NA	0.2393	29	7	39	2.81	1.25	0.3	4.25	NA	NA	MIXTASF	32.0534	16.9471	8.41435	4.26065
Gulf of Mexico	Mexico	RBLP	P48	19.9921	-90.5681	3	85.8824	719.706	17.3529	106.765	NA	NA	30	1	3.3	26	NA	264	529	NA	40	NA	60	NA	2.4453	29	7	40	15.88	1.38	0.47	18.45	NA	NA	MIXTAMA	NA	NA	NA	NA
Gulf of Mexico	Mexico	RBLP	P49	20.1376	-90.5655	3	70.5882	594.118	14.7059	7.0588	NA	NA	19.1333	0.9	4	23	NA	323	1058	NA	20	NA	80	10	2.2975	29	5	36	1.57	0.27	0.76	2.98	8.23	5.3	MIXTAMA	177.233	95.3577	7.79264	4.00236
Gulf of Mexico	Mexico	RBLP	P50	19.9668	-90.5581	3	47.0588	670.588	48.8235	19.1765	9.3529	82.3529	18.7692	0.8	3.5	32	24	352	382	300	75	10	15	NA	1.7667	27	6	41	1.44	0.87	0.39	19.17	1.5	3.91	SFTT	NA	NA	NA	NA
Gulf of Mexico	Mexico	RBLP	P51	20.0308	-90.5254	3	155.882	226.471	NA	NA	NA	NA	35.625	0.9	4.7	NA	NA	272	NA	NA	10	NA	NA	NA	4.0133	28	6	40	1.18	0.28	0.8	2.9	0.79	2.54	TTMA	249.527	144.957	10.7386	6.23343
Gulf of Mexico	Mexico	RBLP	P52	20.5066	-90.538	3	111.765	64.7059	NA	NA	17.6471	17.6471	36.5	1.5	2	29	28	224	NA	NA	50	75	25	35	2.4528	29	7	40	0.05	0.87	0.5	6.5	4.1		MIXTAMA	NA	NA	NA	NA
Gulf of Mexico	Mexico	RBLP	P53	20.1387	-90.5697	3	NA	NA	3.5294	23.5294	5.8824	94.1176	23.42	0.9	3	18.5	18	382	117	705	30	30	25	10	2.4155	31	7	40	17.66	1.27	0.79	5.19	NA	NA	MIXTASF	67.8499	37.6665	7.93933	3.71292
Gulf of Mexico	Mexico	RBLP	P54	20.1875	-90.5307	3	NA	NA	NA	NA	13.1373	102.941	15.77	0.8	3.3	11.5	10	294	NA	470	80	NA	NA	NA	1.2364	29	7	40	4.13	0.97	0.58	12.38	NA	NA	MIXTAMA	298.255	107.381	8.84948	3.32131
Gulf of Mexico	Mexico	RBLP	P55	19.9932	-90.5903	4	47.3529	257.059	31.7647	238.529	NA	NA	32.25	1	4	24	NA	264	823	NA	50	NA	50	NA	3.2353	29	6	42	11.03	1.32	0.15	13.58	NA	NA	MIXTAMA	296.95	142.964	8.01019	3.84231
Gulf of Mexico	Mexico	RBLP	P56	19.9902	-90.5904	4	36.4706	188.235	NA	NA	NA	NA	22	1	3.7	16.5	NA	176	1294	NA	70	NA	30	10	1.4197	29	6	41	25.74	1.13	0.53	12.47	NA	NA	MIXTAMA	25.6617	15.0911	7.42027	4.15473
Gulf of Mexico	Mexico	RBLP	P57	19.9007	-90.5592	4	39.1176	411.765	NA	NA	NA	NA	26.2	0.9	2.3	NA	NA	382	NA	NA	80	NA	NA	20	1.9141	29	7	40	0.91	1.49	0.11	43.77	NA	NA	MIXTAMA	524.532	181.339	8.71674	3.0052
Gulf of Mexico	Mexico	RBLP	P58	19.9458	-90.5686	4	30.8824	295	NA	NA	NA	NA	24.25	1	3.4	NA	NA	25	NA	NA	30	NA	10	NA	0.2061	28	7	41	2.09	0.81	0.13	21.18	NA	NA	SFTT	192.426	117.466	6.90719	4.16741
Gulf of Mexico	Mexico	RBLP	P59	19.9435	-90.592	4	22.6471	100	52.9412	261.765	NA	NA	26.45	0.8	4.7	20	NA	88	1205	NA	30	NA	60	20	0.869	27	8	40	0.8	0.65	0.46	6.77	NA	NA	MIXTAMA	69.3725	18.6459	9.94828	2.70922
Gulf of Mexico	Mexico	RBLP	P60	19.9438	-90.5735	4	46.7647	568.823	NA	NA	NA	NA	22.25	0.9	4.3	NA	NA	264	NA	NA	40	NA	NA	NA	2.1636	28	3	40	1.76	1.43	0.36	112.15	NA	NA	SFTT	57.8032	28.0751	8.07879	3.57454
Gulf of Mexico	Mexico	RBLP	P61	20.0444	-90.588	4	NA	NA	111.765	425.882	NA	NA	NA	NA	NA	40.5	NA	NA	173.52	NA	NA	NA	10	NA	NA	27	7	42	16.94	1.95	0.53	5.92	NA	NA	MIXTAMA	395.578	165.013	9.72591	3.62909
Gulf of Mexico	Mexico	RBLP	P62	20.367	-90.5568	4	153.529	76.4706	223.529	400	NA	NA	56.5	0.9	NA	32.5	NA	NA	255.88	NA	100	NA	90	10	NA	29	7	38	1.61	0.78	0.3	2.58	NA	NA	MIXTAMA	NA	NA	NA	NA
Gulf of Mexico	Mexico	RBLP	P63	19.9018	-90.5915	4	27.6471	344.706	23.5294	135.294	NA	NA	21.65	1.1	5	25	NA	117	64.7	NA	70	NA	10	NA	1.3932	28	8	42	0.75	3.39	0.3	27.75	NA	NA	SFTT	73.8061	34.3842	7.63406	3.63408
Gulf of Mexico	Mexico	RBLP	P64	20.5106	-90.5582	4	NA	14.1176	5.8824	29.4118	5.8824	37.6471	NA	NA	NA	13	14	NA	123.52	1596	15	15	15	NA	0	30	7	37	1.93	0.44	NA	5.48	NA	NA	MIXTASF	754.729	446.822	7.38481	4.37019
Gulf of Mexico	Mexico	RBLP	P65	20.0207	-90.5947	4	147.941	127.059	45.1176	100.294	NA	NA	39.8529	1.5	4.5	19	NA	400	735	NA	30	NA	60	NA	10.914	28	6	41	1.01	0.28	0.6	7.45	6.3	2.86	SFTT	190.141	117.201	6.86087	3.96413
Gulf of Mexico	Mexico	RBLP	P66	20.1199	-90.6137	4	13.5294	182.353	411.765	517.647	NA	NA	27	0.9	3	32	NA	470	1470.58	NA	100	NA	80	NA	3.4263	29	6	40	1.78	0.49	0.11	8.5	1.33	3.9	SFTT	NA	NA	NA	NA
Gulf of Mexico	Mexico	RBLP	P67	20.2117	-90.601	4	NA	NA	NA	NA	NA	NA	42	0.8	3	49	NA	882	352	NA	55	NA	45	NA	8.8906	28	6	40	1.04	0.31	0.8	0.42	1.32	2.37	MIXTAMA	405.019	161.308	10.4192	3.35576
Gulf of Mexico	Mexico	RBLP	P68	20.3661	-90.5811	4	35.2941	29.4118	188.235	141.177	329.412	658.823	55	0.9	3	50	NA	882	2000	NA	25	NA	75	NA	12.3701	29	6	40	1.78	0.49	0.11	8.5	1.33	2.83	MIXTAMA	NA	NA	NA	NA
Gulf of Mexico	Mexico	RBLP	P69	20.5014	-90.5614	4	35.2941	29.4118	NA	NA	225	444	48	1.1	3	24	12	200	NA	1239	50	35	15	NA	3.168	28	6	40	1.4	0.62	0.12	6.26	6.77	3.49	MIXTASF	NA	NA	NA	NA
Gulf of Mexico	Mexico	RBLP	P70	20.1859	-90.5845	4	NA	NA	NA	NA	125	245	NA	NA	NA	NA	NA	NA	NA	NA	NA	NA	25	NA	NA	29	5	36	2.01	0.46	1.16	4.28	0.96	4.31	NA	NA	NA	NA	NA
Gulf of Mexico	Mexico	RBLP	P71	20.4514	-90.5653	5	NA	NA	23.5294	94.1176	NA	NA	NA	NA	NA	25	NA	NA	182.35	NA	20	NA	30	NA	NA	29	7	40	2.71	0.98	0.14	4.16	NA	NA	MIXTASF	56.531	21.1256	8.76098	3.66069
Gulf of Mexico	Mexico	RBLP	P72	19.9672	-90.6175	5	NA	NA	NA	NA	NA	NA	16.45	1	5	14	NA	252	NA	NA	15	NA	80	NA	2.07	27	8	40	NA	NA	NA	NA	NA	NA	SFTT	124.676	74.6127	6.88131	4.10773
Gulf of Mexico	Mexico	RBLP	P73	20.5102	-90.5627	5	NA	NA	35.2941	135.294	5.8824	170.588	NA	NA	NA	29	13	NA	794	411	NA	NA	30	NA	NA	29	7	40	2.13	1.22	0.81	0.46	NA	NA	MIXTASF	219.079	75.8651	8.8344	2.8881
Gulf of Mexico	Mexico	RBLP	P74	20.1856	-90.6026	5	NA	NA	191.177	511.765	NA	NA	NA	NA	NA	54.5	NA	NA	144	NA	NA	NA	10	NA	NA	29	7	39	1.64	0.99	0.23	2.78	NA	NA	MIXTAMA	77.5776	34.5121	9.40797	3.64703
Gulf of Mexico	Mexico	RBLP	P75	20.2471	-90.6259	5	NA	NA	NA	NA	NA	NA	31	1	3	36	NA	176	588	NA	50	NA	50	NA	1.5822	28	6	40	1.8	0.58	0.1	8.46	1.88	3.39	SFTT	NA	NA	NA	NA
Gulf of Mexico	Mexico	RBLP	P76	19.97	-90.6751	5	67.6471	117.647	NA	NA	NA	NA	34.8	1.8	3	NA	NA	64	NA	NA	40	NA	NA	40	1.2027	28	5	39	1.7	0.42	0.12	7.41	1.3	3.53	MIXTASF	NA	NA	NA	NA
Gulf of Mexico	Mexico	RBLP	P77	20.1917	-90.5899	5	NA	NA	NA	NA	NA	NA	20	1	5	60	NA	10	NA	NA	40	NA	60	NA	0.1	39	6	40	1.17	0.36	0.8	NA	NA	NA	MIXTAMA	100.859	67.6955	6.2391	4.12029
Gulf of Mexico	Mexico	RBLP	P78	19.9419	-90.519	5	29.4118	41.1765	45.8529	202.941	NA	NA	52.2377	1.7	4.5	42	NA	48	705	NA	45	NA	55	NA	1.8806	28	6	40	1	0.8	0.23	1.14	2.52	3.23	MIXTAMA	NA	NA	NA	NA
Gulf of Mexico	Mexico	RBLP	P79	20.0319	-90.6526	5	147.353	161.765	64.7059	52.9412	NA	NA	37.5556	1.2	4.3	NA	NA	112	NA	NA	30	NA	NA	NA	2.1062	28	7	40	NA	NA	NA	0.91	3.7	3.23	SFTT	NA	NA	NA	NA
Gulf of Mexico	Mexico	RBLP	P80	20.3616	-90.617	5	NA	NA	147.059	141.177	NA	NA	49.25	0.9	3	57	NA	144	1000	NA	40	NA	60	NA	1.9148	28	6	40	1.27	0.89	0.18	121.7	0.33	2.78	MIXTASF	416.994	266.26	7.43481	4.83019
Gulf of Mexico	Mexico	RBLP	P81	20.3935	-90.6059	5	NA	NA	11.4706	100.882	NA	NA	50	0.9	2.5	64	NA	240	882	NA	30	NA	70	15	0.27	29	6	40	1.54	0.46	0.13	3.65	0.96	2.69	SFTT	182.42	101.258	4.34507	2.40144
Gulf of Mexico	Mexico	RBLP	P82	20.4955	-90.6029	5	11.7647	135.294	NA	NA	NA	NA	41.1429	1.8	1.7	NA	16	78	NA	764	50	20	NA	NA	0.9806	29	6	40	3.3	0.61	0.7	18.71	0.29	3.23	MIXTASF	NA	NA	NA	NA
Gulf of Mexico	Mexico	RBLP	P83	20.1221	-90.6495	5	NA	NA	111.765	64.7059	NA	NA	NA	NA	NA	44	NA	NA	294	NA	50	NA	50	NA	NA	29	6	36	NA	0.4	0.63	4.89	1.89		SFTT	NA	NA	NA	NA
Gulf of Mexico	Mexico	RBLP	P84	20.3605	-90.6484	5	NA	NA	73.5294	82.3529	NA	NA	31.75	1.3	3	64	14	176	NA	224	40	10	25	NA	2.1793	29	6	39	0.76	0.14	0.7	0.33	1.66	2.31	MIXTASF	658.506	363.337	7.14471	3.98379
Gulf of Mexico	Mexico	RBLP	P85	20.4903	-90.6512	5	NA	NA	NA	NA	NA	NA	40	1	4	NA	NA	47	NA	NA	35	50	NA	NA	0.7332	28	6	40	NA	NA	NA	NA	NA	NA	MIXTASF	NA	NA	NA	NA
Gulf of Mexico	Mexico	RBLP	P86	19.9666	-90.6342	5	101.978	484.183	62.0533	174.573	46.2898	141.765	60	0.6	3	45	NA	192	NA	NA	50	NA	50	NA	2.0736	28	6	40	1.76	0.49	0.11	8.54	1.33	2.53	MIXTAMA	NA	NA	NA	NA

## Sheet: Sediment
Year	Region	Country	Estate	Location	Lat	Lon	Water Depth	ID_Core	Replicate	L-Section	Secction	L_total	BD	Munsell Color	Corg Mgha	Cing Mgha	Corg %	Cing %
2018	Gulf of Mexico	Mexico	Campeche	RBLP	20.0489	-90.4853	1	CC_01	R1	31	0_31	96	0.123444	2.5Y 6/1	63.7582	14.1547	16.6611	3.69886
2018	Gulf of Mexico	Mexico	Campeche	RBLP	20.0489	-90.4853	1	CC_01	R2	31	0_31	96	0.161359	2.5Y 6/1	77.2461	24.5972	15.4426	4.91735
2018	Gulf of Mexico	Mexico	Campeche	RBLP	20.0489	-90.4853	1	CC_01	R1	27	31_58	96	0.0982261	2.5Y 3/1	64.4682	2.63012	24.3083	0.991712
2018	Gulf of Mexico	Mexico	Campeche	RBLP	20.0489	-90.4853	1	CC_01	R2	27	31_58	96	0.119917	2.5Y 3/1	58.6768	2.06361	18.1226	0.637358
2018	Gulf of Mexico	Mexico	Campeche	RBLP	20.0489	-90.4853	1	CC_01	R1	28	58_86	96	0.0811203	10YR 3/2	85.6369	2.58308	37.7028	1.13723
2018	Gulf of Mexico	Mexico	Campeche	RBLP	20.0489	-90.4853	1	CC_01	R2	28	58_86	96	0.109336	10YR 3/2	97.1996	2.78609	31.7499	0.910066
2018	Gulf of Mexico	Mexico	Campeche	RBLP	20.0489	-90.4853	1	CC_01	R1	10	86_96	96	0.116096	5Y 4/1	48.8977	3.64737	42.1183	3.14168
2018	Gulf of Mexico	Mexico	Campeche	RBLP	20.0489	-90.4853	1	CC_01	R2	10	86_96	96	0.13814	5Y 4/1	59.7593	4.006	43.26	2.89996
2018	Gulf of Mexico	Mexico	Campeche	RBLP	20.5089	-90.4979	1	CIA13	R1	35	0_35	100	0.490249	2.5Y 7/1	118.746	57.8171	6.92045	3.36955
2018	Gulf of Mexico	Mexico	Campeche	RBLP	20.5089	-90.4979	1	CIA13	R2	35	0_35	100	0.65249	2.5Y 7/1	189.216	87.3413	8.28547	3.82453
2018	Gulf of Mexico	Mexico	Campeche	RBLP	20.5089	-90.4979	1	CIA13	R1	65	35_100	100	0.107573	2.5Y 3/1	75.4771	5.42288	10.7944	0.775559
2018	Gulf of Mexico	Mexico	Campeche	RBLP	20.5089	-90.4979	1	CIA13	R2	65	35_100	100	0.0758299	2.5Y 3/1	118.538	10.7978	24.0493	2.19069
2018	Gulf of Mexico	Mexico	Campeche	RBLP	20.3627	-90.4867	1	CIA1	R1	10	0_10	75	0.0714212	10YR 5/2	15.1849	1.69908	21.261	2.37896
2018	Gulf of Mexico	Mexico	Campeche	RBLP	20.3627	-90.4867	1	CIA1	R2	10	0_10	75	0.0599585	10YR 5/2	12.028	1.30076	20.0606	2.16943
2018	Gulf of Mexico	Mexico	Campeche	RBLP	20.3627	-90.4867	1	CIA1	R1	32	10_42	75	0.153423	10YR 2/2	121.465	4.61212	24.7406	0.939419
2018	Gulf of Mexico	Mexico	Campeche	RBLP	20.3627	-90.4867	1	CIA1	R2	32	10_42	75	0.117272	10YR 2/2	122.551	9.20626	32.6568	2.45324
2018	Gulf of Mexico	Mexico	Campeche	RBLP	20.3627	-90.4867	1	CIA1	R1	33	42_75	75	0.162241	10YR 3/1	147.888	8.23286	27.6223	1.53772
2018	Gulf of Mexico	Mexico	Campeche	RBLP	20.3627	-90.4867	1	CIA1	R2	33	42_75	75	0.180757	10YR 3/1	123.731	7.20071	20.7428	1.20716
2018	Gulf of Mexico	Mexico	Campeche	RBLP	20.0789	-90.4859	1	CC_29	R1	25	0_25	106	0.242479	2.5Y 5/1	54.2278	12.0903	8.94556	1.99444
2018	Gulf of Mexico	Mexico	Campeche	RBLP	20.0789	-90.4859	1	CC_29	R2	25	0_25	106	0.160477	2.5Y 5/1	52.0749	11.8753	12.98	2.95999
2018	Gulf of Mexico	Mexico	Campeche	RBLP	20.0789	-90.4859	1	CC_29	R1	35	25_60	106	0.220436	2.5Y 5/1	61.6502	22.3688	7.9907	2.8993
2018	Gulf of Mexico	Mexico	Campeche	RBLP	20.0789	-90.4859	1	CC_29	R2	35	25_60	106	0.387085	2.5Y 6/1	306.084	153.328	22.5926	11.3174
2018	Gulf of Mexico	Mexico	Campeche	RBLP	20.0789	-90.4859	1	CC_29	R1	10	60_70	106	0.872044	2.5Y 8/1	64.3781	35.4709	7.38244	4.06756
2018	Gulf of Mexico	Mexico	Campeche	RBLP	20.0789	-90.4859	1	CC_29	R2	10	60_70	106	0.549326	2.5Y 8/1	27.7931	15.3949	5.05949	2.80251
2018	Gulf of Mexico	Mexico	Campeche	RBLP	20.0789	-90.4859	1	CC_29	R1	36	70_106	106	1.02635	2.5Y 7/2	473.159	4.95529	12.8059	0.134113
2018	Gulf of Mexico	Mexico	Campeche	RBLP	20.0789	-90.4859	1	CC_29	R2	36	70-106	106	0.77417	2.5Y 7/2	361.438	3.3815	12.9687	0.121331
2017	Gulf of Mexico	Mexico	Campeche	RBLP	19.9422	-90.5033	1	CC_2.4	R1	15	0_15	32	0.245216	10YR 5/2	82.9689	12.7021	22.5567	3.45331
2017	Gulf of Mexico	Mexico	Campeche	RBLP	19.9422	-90.5033	1	CC_2.4	R1	15	0_15	32	0.3129	2.5Y 5/2	58.7307	10.9677	12.5132	2.33679
2017	Gulf of Mexico	Mexico	Campeche	RBLP	19.9422	-90.5033	1	CC_2.4	R2	17	15_32	32	0.196173	2.5Y 5/2	41.469	7.15435	12.4347	2.14527
2017	Gulf of Mexico	Mexico	Campeche	RBLP	19.9422	-90.5033	1	CC_2.4	R2	17	15_32	32	0.199723	10 YR 6/2	42.3379	8.08232	12.4696	2.38044
2017	Gulf of Mexico	Mexico	Campeche	RBLP	19.9423	-90.4618	1	CC_2V1	R1	15	0_15	53	0.115198	2.5Y 3/2	26.0136	4.84171	15.0545	2.80197
2017	Gulf of Mexico	Mexico	Campeche	RBLP	19.9423	-90.4618	1	CC_2V1	R1	15	0_15	53	0.190985	10YR 5/2, 10YR 7/1	49.6704	6.09416	17.3383	2.12727
2017	Gulf of Mexico	Mexico	Campeche	RBLP	19.9423	-90.4618	1	CC_2V1	R1	8	15_23	53	0.325383	10YR 6/1	30.5061	8.34291	11.7193	3.20504
2017	Gulf of Mexico	Mexico	Campeche	RBLP	19.9423	-90.4618	1	CC_2V1	R1	8	15_23	53	0.250605	10YR 3/1	46.2297	1.06337	23.059	0.530403
2017	Gulf of Mexico	Mexico	Campeche	RBLP	19.9423	-90.4618	1	CC_2V1	R2	23	23_46	53	0.287657	10YR 3/1, 10YR 6/4	125.37	5.69091	18.9492	0.860158
2017	Gulf of Mexico	Mexico	Campeche	RBLP	19.9423	-90.4618	1	CC_2V1	R2	23	23_46	53	0.128267	10 YR 5/1, 10YR 6/2	45.5699	8.01739	15.4467	2.71763
2017	Gulf of Mexico	Mexico	Campeche	RBLP	19.9423	-90.4618	1	CC_2V1	R2	13	46_53	53	0.251111	10YR 5/2	53.9668	7.87427	16.5317	2.41214
2017	Gulf of Mexico	Mexico	Campeche	RBLP	19.9423	-90.4618	1	CC_2V1	R2	13	46_53	53	0.597187	10YR 6/2	77.6514	33.2831	10.0022	4.28717
2017	Gulf of Mexico	Mexico	Campeche	RBLP	19.8998	-90.4937	1	CC_1.3	R1	7	0_7	30	0.141471	10YR 5/2, 2.5Y 5/1	15.6843	2.91531	15.838	2.94388
2017	Gulf of Mexico	Mexico	Campeche	RBLP	19.8998	-90.4937	1	CC_1.3	R2	7	0_7	30	0.254647	2.5Y 4/1, 2.5Y 7/1	15.684	6.87222	8.79872	3.85531
2017	Gulf of Mexico	Mexico	Campeche	RBLP	19.8998	-90.4937	1	CC_1.3	R1	11	7_18	30	0.308663	2.5Y 7/1	41.4973	11.6402	12.222	3.42834
2017	Gulf of Mexico	Mexico	Campeche	RBLP	19.8998	-90.4937	1	CC_1.3	R2	11	7_18	30	0.365252	2.5Y 5/2	66.0009	10.8579	16.4272	2.70248
2017	Gulf of Mexico	Mexico	Campeche	RBLP	19.8998	-90.4937	1	CC_1.3	R1	12	18_30	30	0.488074	10YR 7/1	70.5527	20.2457	12.0461	3.45674
2017	Gulf of Mexico	Mexico	Campeche	RBLP	19.8998	-90.4937	1	CC_1.3	R2	12	18_30	30	0.747437	2.5Y 7/1	112.016	29.4424	12.4889	3.28259
2017	Gulf of Mexico	Mexico	Campeche	RBLP	20.1363	-90.4901	1	CC_6.1	R1	22	0_22	22	0.151895	2.5Y 5/2	39.3707	17.8724	11.7817	5.3483
2017	Gulf of Mexico	Mexico	Campeche	RBLP	20.1363	-90.4901	1	CC_6.1	R2	22	0_22	22	0.466853	2.5Y 5/2	132.717	74.2387	12.9219	7.22815
2017	Gulf of Mexico	Mexico	Campeche	RBLP	19.9425	-90.5287	1	CC_2.6	R1	12	0_12	27	0.22409	5Y 6/1, 10YR 6/2	31.7255	8.13248	11.7979	3.02426
2017	Gulf of Mexico	Mexico	Campeche	RBLP	19.9425	-90.5287	1	CC_2.6	R2	12	0_12	27	0.112045	5Y 7/1, 5Y 6/1	18.3754	3.59734	13.6667	2.67552
2017	Gulf of Mexico	Mexico	Campeche	RBLP	19.9425	-90.5287	1	CC_2.6	R1	15	12_27	27	0.60476	5Y 6/1, 10YR 6/2	69.978	33.1143	7.71413	3.65041
2017	Gulf of Mexico	Mexico	Campeche	RBLP	19.9425	-90.5287	1	CC_2.6	R2	15	12_27	27	0.127609	5Y 7/1, 5Y 6/1, 10YR 5/3	15.2915	6.91345	7.98874	3.61179
2018	Gulf of Mexico	Mexico	Campeche	RBLP	20.136	-90.4767	2	CT6M01	R1	27	0_27	103	0.263641	2.5y 6/1	85.5143	22.1146	12.0133	3.10672
2018	Gulf of Mexico	Mexico	Campeche	RBLP	20.136	-90.4767	2	CT6M01	R2	27	0_27	103	0.263641	2.5y 6/1	88.9985	24.7521	12.5028	3.47724
2018	Gulf of Mexico	Mexico	Campeche	RBLP	20.136	-90.4767	2	CT6M01	R1	12	27_39	103	0.304201	2.5y 5/1	37.2782	9.81215	10.212	2.68796
2018	Gulf of Mexico	Mexico	Campeche	RBLP	20.136	-90.4767	2	CT6M01	R2	12	27_39	103	0.300674	2.5y 5/1	58.2799	14.9644	16.1526	4.14744
2018	Gulf of Mexico	Mexico	Campeche	RBLP	20.136	-90.4767	2	CT6M01	R1	31	39_70	103	0.152542	2.5Y 2.5/1	150.061	11.7581	31.7335	2.4865
2018	Gulf of Mexico	Mexico	Campeche	RBLP	20.136	-90.4767	2	CT6M01	R2	31	39_70	103	0.214263	2.5Y 2.5/1	262.16	16.6114	39.4691	2.5009
2018	Gulf of Mexico	Mexico	Campeche	RBLP	20.136	-90.4767	2	CT6M01	R1	8	70_78	103	0.475259	2.5Y 6/1	46.8318	18.4498	12.3174	4.85256
2018	Gulf of Mexico	Mexico	Campeche	RBLP	20.136	-90.4767	2	CT6M01	R2	8	70_78	103	0.357988	2.5Y 6/1	39.9177	16.4725	13.9382	5.75178
2018	Gulf of Mexico	Mexico	Campeche	RBLP	20.136	-90.4767	2	CT6M01	R1	12	78_90	103	0.275104	5y 3/1	138.136	10.2877	41.8437	3.11631
2018	Gulf of Mexico	Mexico	Campeche	RBLP	20.136	-90.4767	2	CT6M01	R2	12	78_90	103	0.426764	5y 3/1	115.525	23.8734	22.5583	4.66171
2018	Gulf of Mexico	Mexico	Campeche	RBLP	20.136	-90.4767	2	CT6M01	R1	13	90_103	103	0.711273	2.5Y 7/1	79.6051	46.7951	8.60918	5.06082
2018	Gulf of Mexico	Mexico	Campeche	RBLP	20.136	-90.4767	2	CT6M01	R2	13	90_103	103	0.747277	2.5Y 7/1	79.2344	46.0839	8.15622	4.74378
2018	Gulf of Mexico	Mexico	Campeche	RBLP	20.0464	-90.4896	2	CEP2	R1	37	0_37	77	0.115508	GLEY 6 N	28.4679	4.86779	6.66102	1.13898
2018	Gulf of Mexico	Mexico	Campeche	RBLP	20.0464	-90.4896	2	CEP2	R2	37	0_37	77	0.138434	GLEY 6 N	12.841	2.4227	2.50701	0.472995
2018	Gulf of Mexico	Mexico	Campeche	RBLP	20.0464	-90.4896	2	CEP2	R1	18	37_55	77	0.216027	2.5Y 6/1	57.422	13.3095	14.7672	3.42281
2018	Gulf of Mexico	Mexico	Campeche	RBLP	20.0464	-90.4896	2	CEP2	R2	18	37_55	77	0.179876	2.5Y 6/1	46.7236	10.5523	14.4309	3.25915
2018	Gulf of Mexico	Mexico	Campeche	RBLP	20.0464	-90.4896	2	CEP2	R1	22	55_77	77	0.566079	2.5Y 6/1	151.034	53.0825	12.1276	4.26238
2018	Gulf of Mexico	Mexico	Campeche	RBLP	20.0464	-90.4896	2	CEP2	R2	22	55_77	77	0.40472	2.5y 5/1	175.42	48.6899	19.7016	5.46841
2018	Gulf of Mexico	Mexico	Campeche	RBLP	20.136	-90.4767	2	CT6M01-A	R1	45	0_45	57	0.0361515	10YR 5/1	40.7709	2.29089	25.0618	1.4082
2018	Gulf of Mexico	Mexico	Campeche	RBLP	20.136	-90.4767	2	CT6M01-A	R2	45	0_45	57	0.0511411	10YR 5/1	66.3138	3.37106	28.8152	1.46482
2018	Gulf of Mexico	Mexico	Campeche	RBLP	20.136	-90.4767	2	CT6M01-A	R1	12	45_57	57	0.0864108	2.5Y 6/1	12.9368	2.45127	12.476	2.36397
2018	Gulf of Mexico	Mexico	Campeche	RBLP	20.136	-90.4767	2	CT6M01-A	R2	12	45_57	57	0.13667	2.5Y 6/1	17.486	3.08015	10.6619	1.87809
2018	Gulf of Mexico	Mexico	Campeche	RBLP	20.3639	-90.5009	2	CCIA2	R1	15	0_15	42	0.185166	2.5Y 6/1	23.4094	7.17075	8.42826	2.58174
2018	Gulf of Mexico	Mexico	Campeche	RBLP	20.3639	-90.5009	2	CCIA2	R2	15	0_15	42	0.165768	2.5Y 6/1	28.7463	9.29733	11.5609	3.7391
2018	Gulf of Mexico	Mexico	Campeche	RBLP	20.3639	-90.5009	2	CCIA2	R1	5	15_20	42	0.248651	2.5Y 7/1	11.2001	4.22877	9.00864	3.40136
2018	Gulf of Mexico	Mexico	Campeche	RBLP	20.3639	-90.5009	2	CCIA2	R2	5	15_20	42	0.2125	2.5Y 7/1	7.92123	3.21377	7.45528	3.02472
2018	Gulf of Mexico	Mexico	Campeche	RBLP	20.3639	-90.5009	2	CCIA2	R1	22	20_42	42	0.171146	2.5Y 6/1	27.0919	13.9866	7.19531	3.71469
2018	Gulf of Mexico	Mexico	Campeche	RBLP	20.3639	-90.5009	2	CCIA2	R2	22	20_42	42	0.119035	2.5Y 6/1	9.71331	4.64282	3.7091	1.7729
2018	Gulf of Mexico	Mexico	Campeche	RBLP	20.5064	-90.5058	2	CIA12	R1	21	0_21	21	0.278631	2.5Y 8/1	4.54195	1.95293	0.776236	0.333764
2018	Gulf of Mexico	Mexico	Campeche	RBLP	20.5064	-90.5058	2	CIA12	R2	21	0_21	21	0.311255	2.5Y 8/1	88.8057	40.0913	13.5864	6.13358
2018	Gulf of Mexico	Mexico	Campeche	RBLP	19.9276	-90.4772	2	CC339	R1	25	0_25	45	0.340353	2.5Y 7/1	52.7241	17.3035	6.1964	2.0336
2018	Gulf of Mexico	Mexico	Campeche	RBLP	19.9276	-90.4772	2	CC339	R2	25	0_25	45	0.211618	2.5Y 7/1	49.9243	17	9.43667	3.21333
2018	Gulf of Mexico	Mexico	Campeche	RBLP	19.9276	-90.4772	2	CC339	R1	20	25_45	45	0.363278	2.5Y 7/1	49.316	22.3224	6.78765	3.07235
2018	Gulf of Mexico	Mexico	Campeche	RBLP	19.9276	-90.4772	2	CC339	R2	20	25_45	45	0.317868	2.5Y 7/1	22.7928	11.0919	3.58526	1.74474
2017	Gulf of Mexico	Mexico	Campeche	RBLP	20.0441	-90.535	2	CC4.3	R1	20	0_20	50	0.100559	10YR 5/3	19.3033	8.21609	9.598	4.08521
2017	Gulf of Mexico	Mexico	Campeche	RBLP	20.0441	-90.535	2	CC4.3	R2	20	0_20	50	0.46176	10 YR 6/2	80.5414	38.6383	8.72113	4.1838
2017	Gulf of Mexico	Mexico	Campeche	RBLP	20.0441	-90.535	2	CC4.3	R1	30	20_50	50	0.253559	10YR 8/1	51.9582	32.3029	6.83052	4.24659
2017	Gulf of Mexico	Mexico	Campeche	RBLP	20.0441	-90.535	2	CC4.3	R2	30	20_50	50	0.27271	10YR 7/1	101.514	28.9409	12.408	3.53744
2017	Gulf of Mexico	Mexico	Campeche	RBLP	19.9681	-90.5422	2	CC_07	R1	10	0_10	40	0.345189	2.5Y 6/1	33.648	10.2635	9.74772	2.97331
2017	Gulf of Mexico	Mexico	Campeche	RBLP	19.9681	-90.5422	2	CC_07	R2	10	0_10	40	0.452706	2.5Y 6/2	43.4621	15.969	9.60051	3.52746
2017	Gulf of Mexico	Mexico	Campeche	RBLP	19.9681	-90.5422	2	CC_07	R1	15	10_25	40	0.692263	2.5Y 7/1	94.3002	37.7095	9.08134	3.63152
2017	Gulf of Mexico	Mexico	Campeche	RBLP	19.9681	-90.5422	2	CC_07	R2	15	10_25	40	0.726216	2.5Y 7/1	95.1537	42.5063	8.73511	3.90208
2017	Gulf of Mexico	Mexico	Campeche	RBLP	19.9681	-90.5422	2	CC_07	R1	15	25_40	40	0.0119779	2.5Y 7/1	1.30575	0.683939	7.26756	3.80668
2017	Gulf of Mexico	Mexico	Campeche	RBLP	19.9681	-90.5422	2	CC_07	R2	15	25-40	40	1.22419	2.5Y 7/2	185.644	101.509	10.1097	5.52793
2017	Gulf of Mexico	Mexico	Campeche	RBLP	20.4486	-90.503	2	CC12.1	R1	12	0_12	45	0.0723073	10YR 6/1	12.3917	1.66482	14.2813	1.91869
2017	Gulf of Mexico	Mexico	Campeche	RBLP	20.4486	-90.503	2	CC12.1	R2	12	0-12	45	0.0518726	2.5Y 5/2	7.55849	0.838642	12.1427	1.34728
2017	Gulf of Mexico	Mexico	Campeche	RBLP	20.4486	-90.503	2	CC12.1	R1	14	12_26	45	0.710682	10YR 7/1, 10YR 5/1	94.6979	40.5165	9.51781	4.07219
2017	Gulf of Mexico	Mexico	Campeche	RBLP	20.4486	-90.503	2	CC12.1	R2	14	12_26	45	0.331813	2.5Y 5/1	47.4689	13.2463	10.2185	2.85149
2017	Gulf of Mexico	Mexico	Campeche	RBLP	20.4486	-90.503	2	CC12.1	R1	19	26_45	45	0.0105443	10YR 6/1	1.8957	0.832953	9.46233	4.15767
2017	Gulf of Mexico	Mexico	Campeche	RBLP	20.4486	-90.503	2	CC12.1	R2	19	26-45	45	0.0147365	2.5Y 7/1	2.54814	0.825792	9.10068	2.94932
2017	Gulf of Mexico	Mexico	Campeche	RBLP	19.899	-90.4996	2	CC1.4	R1	10	0_10	39	0.164106	2.5Y 6/1	20.4106	4.07018	12.4375	2.48021
2017	Gulf of Mexico	Mexico	Campeche	RBLP	19.899	-90.4996	2	CC1.4	R2	10	0_10	39	0.101859	2.5Y 6/1	18.3603	2.93481	18.0252	2.88125
2017	Gulf of Mexico	Mexico	Campeche	RBLP	19.899	-90.4996	2	CC1.4	R1	13	10_23	39	0.0805295	2.5Y 4/3	14.9634	3.04615	14.2933	2.90973
2017	Gulf of Mexico	Mexico	Campeche	RBLP	19.899	-90.4996	2	CC1.4	R2	13	10_23	39	0.272059	2.5Y 6/2	49.9985	9.45182	14.1368	2.67245
2017	Gulf of Mexico	Mexico	Campeche	RBLP	19.899	-90.4996	2	CC1.4	R1	16	23_39	39	0.638387	2.5Y 6/2, 2.5Y 6/1	81.4791	38.1563	7.97705	3.73561
2017	Gulf of Mexico	Mexico	Campeche	RBLP	19.899	-90.4996	2	CC1.4	R2	16	23_39	39	0.444622	10YR 7/2	59.9862	27.5036	8.43218	3.86615
2017	Gulf of Mexico	Mexico	Campeche	RBLP	20.1388	-90.5513	2	CC6.4	R1	10	0_10	21	0.585689	2.5Y 6/1	52.1951	22.1288	8.91175	3.77825
2017	Gulf of Mexico	Mexico	Campeche	RBLP	20.1388	-90.5513	2	CC6.4	R2	10	0_10	21	0.257477	2.5Y 7/1	25.5111	8.86204	9.90812	3.44188
2017	Gulf of Mexico	Mexico	Campeche	RBLP	20.1388	-90.5513	2	CC6.4	R1	11	10_21	21	0.859707	2.5Y 6/1	95.0354	34.3332	10.0495	3.63054
2017	Gulf of Mexico	Mexico	Campeche	RBLP	20.1388	-90.5513	2	CC6.4	R2	11	10-21	21	0.393546	2.5Y 6/2	49.6813	18.2841	11.4764	4.22362
2017	Gulf of Mexico	Mexico	Campeche	RBLP	20.449	-90.529	2	CC12.2	R1	15	0_15	35	0.251818	2.5Y 6/2	48.0649	16.5641	12.7248	4.38521
2017	Gulf of Mexico	Mexico	Campeche	RBLP	20.449	-90.529	2	CC12.2	R2	15	0_15	35	0.27351	2.5Y 4/2	60.1195	22.3028	14.6538	5.43619
2017	Gulf of Mexico	Mexico	Campeche	RBLP	20.449	-90.529	2	CC12.2	R1	15	15_30	35	0.0135812	2.5Y 7/1	1.97918	0.398204	9.71532	1.95468
2017	Gulf of Mexico	Mexico	Campeche	RBLP	20.449	-90.529	2	CC12.2	R2	15	15_30	35	0.0237105	2.5Y 8/1	4.68562	1.27164	13.1745	3.57547
2017	Gulf of Mexico	Mexico	Campeche	RBLP	20.449	-90.529	2	CC12.2	R2	5	30_35	35	0.0134044	2.5Y 8/1	0.65951	0.243943	9.84024	3.63976
2017	Gulf of Mexico	Mexico	Campeche	RBLP	20.449	-90.529	2	CC12.2	R1	5	30_35	35	0.0140056	2.5Y 8/1	0.94234	0.241834	13.4566	3.45339
2017	Gulf of Mexico	Mexico	Campeche	RBLP	20.5106	-90.5866	2	CC13.9	R1	15	0_15	46	0.067906	2.5Y 7/1	10.3194	3.52318	10.1311	3.45888
2017	Gulf of Mexico	Mexico	Campeche	RBLP	20.5106	-90.5866	2	CC13.9	R2	15	0_15	46	0.120722	2.5Y 7/1	17.7813	7.55211	9.81946	4.17054
2017	Gulf of Mexico	Mexico	Campeche	RBLP	20.5106	-90.5866	2	CC13.9	R1	31	15_46	46	0.2886	2.5Y 8/1	79.3665	41.2338	8.87113	4.60887
2017	Gulf of Mexico	Mexico	Campeche	RBLP	20.5106	-90.5866	2	CC13.9	R2	31	15_46	46	0.549378	2.5Y 7/2	155.549	87.4794	9.13343	5.13657
2017	Gulf of Mexico	Mexico	Campeche	RBLP	20.2329	-90.5283	2	CC8.3	R1	17	0_17	30	0.313004	2.5Y 6/2	61.5047	32.3589	11.5587	6.08129
2017	Gulf of Mexico	Mexico	Campeche	RBLP	20.2329	-90.5283	2	CC8.3	R2	17	0_17	30	0.284606	2.5Y 6/2	41.7433	21.6384	8.62768	4.47232
2017	Gulf of Mexico	Mexico	Campeche	RBLP	20.2329	-90.5283	2	CC8.3	R1	13	17_30	30	0.748707	5Y 7/1	73.1656	42.1727	7.51713	4.33287
2017	Gulf of Mexico	Mexico	Campeche	RBLP	20.2329	-90.5283	2	CC8.3	R2	13	17_30	30	0.485353	2.5Y 7/1	47.3716	26.3244	7.50787	4.17213
2017	Gulf of Mexico	Mexico	Campeche	RBLP	20.1363	-90.5105	2	CC6.2	R1	22	0_22	33	0.704781	2.5Y 7/1	119.155	68.3886	7.68487	4.41069
2017	Gulf of Mexico	Mexico	Campeche	RBLP	20.1363	-90.5105	2	CC6.2	R2	22	0_22	33	0.54702	2.5Y 7/2	96.2721	54.1213	7.99971	4.4972
2017	Gulf of Mexico	Mexico	Campeche	RBLP	20.1363	-90.5105	2	CC6.2	R1	11	22_33	33	0.0191886	2.5Y 8/1	1.52968	0.735234	7.2471	3.48329
2017	Gulf of Mexico	Mexico	Campeche	RBLP	20.1363	-90.5105	2	CC6.2	R2	11	22_33	33	0.0101051	2.5Y 8/1	0.917947	0.367431	8.25822	3.30556
2018	Gulf of Mexico	Mexico	Campeche	RBLP	19.9419	-90.519	3	CA3	R1	30	0_30	59	0.394234	2.5Y 8/1	101.021	62.3098	8.54157	5.26843
2018	Gulf of Mexico	Mexico	Campeche	RBLP	19.9419	-90.519	3	CA3	R2	30	0_30	59	0.387421	2.5Y 8/1	98.9404	59.4762	8.51273	5.11727
2018	Gulf of Mexico	Mexico	Campeche	RBLP	19.9419	-90.519	3	CA3	R1	29	30_59	59	0.461908	2.5Y 7/1	26.5683	14.5554	1.9834	1.0866
2018	Gulf of Mexico	Mexico	Campeche	RBLP	19.9419	-90.519	3	CA3	R2	29	30_59	59	0.551837	2.5Y 7/1	87.8151	50.133	5.48733	3.13267
2018	Gulf of Mexico	Mexico	Campeche	RBLP	19.9367	-90.5079	3	CC337	R1	15	0-15	32	0.346696	2.5y 6/1	62.7765	23.2907	12.0714	4.47861
2018	Gulf of Mexico	Mexico	Campeche	RBLP	19.9367	-90.5079	3	CC337	R2	15	0_15	32	0.496577	2.5y 6/1	90.3734	33.7957	12.1328	4.53716
2018	Gulf of Mexico	Mexico	Campeche	RBLP	19.9367	-90.5079	3	CC337	R1	17	15_32	32	0.304759	2.5y 6/1	35.0863	17.6035	6.77223	3.39777
2018	Gulf of Mexico	Mexico	Campeche	RBLP	19.9367	-90.5079	3	CC337	R2	17	15_32	32	0.299763	2.5y 6/1	38.7234	19.9312	7.59883	3.91117
2018	Gulf of Mexico	Mexico	Campeche	RBLP	20.0308	-90.5254	3	CC3	R1	44	0_44	44	0.219554	2.5Y 6/1	55.4304	31.7738	5.73791	3.28909
2018	Gulf of Mexico	Mexico	Campeche	RBLP	20.0308	-90.5254	3	CC3	R2	44	0_44	44	0.247064	2.5Y 6/1	54.3614	32.0074	5.00066	2.94434
2017	Gulf of Mexico	Mexico	Campeche	RBLP	20.5098	-90.5132	3	CC13.2	R1	22	0_22	28	0.528696	10YR 6/1	103.862	48.3702	8.92948	4.15861
2017	Gulf of Mexico	Mexico	Campeche	RBLP	20.5098	-90.5132	3	CC13.2	R1	22	0_22	28	0.291571	10YR 7/2	48.4535	27.0021	7.55367	4.2095
2017	Gulf of Mexico	Mexico	Campeche	RBLP	20.5098	-90.5132	3	CC13.2	R2	6	22_28	28	0.266222	10YR 5/3	15.9483	6.20728	9.98436	3.88603
2017	Gulf of Mexico	Mexico	Campeche	RBLP	20.5098	-90.5132	3	CC13.2	R2	6	22_28	28	0.641334	10YR 6/2	31.738	16.1313	8.24792	4.19211
2017	Gulf of Mexico	Mexico	Campeche	RBLP	19.8995	-90.5189	3	CC1.6	R1	16	0_16	39	0.187825	2.5Y 5/1	32.2036	9.77901	10.716	3.25403
2017	Gulf of Mexico	Mexico	Campeche	RBLP	19.8995	-90.5189	3	CC1.6	R2	16	0_16	39	0.427949	2.5Y 5/1	71.3136	26.6011	10.415	3.88497
2017	Gulf of Mexico	Mexico	Campeche	RBLP	19.8995	-90.5189	3	CC1.6	R2	23	16_39	39	0.063276	2.5Y 7/2	12.9096	5.4569	8.87045	3.74955
2017	Gulf of Mexico	Mexico	Campeche	RBLP	19.8995	-90.5189	3	CC1.6	R2	23	16_39	39	0.414981	2.5Y 7/1	104.107	37.821	10.9074	3.96257
2017	Gulf of Mexico	Mexico	Campeche	RBLP	20.0981	-90.6091	3	CC5.8	R1	14	0_14	39	0.245216	2.5Y 6/1	31.587	10.9138	9.20094	3.17906
2017	Gulf of Mexico	Mexico	Campeche	RBLP	20.0981	-90.6091	3	CC5.8	R2	14	0_14	39	0.103072	2.5Y 6/1	12.7298	4.19659	8.82176	2.90824
2017	Gulf of Mexico	Mexico	Campeche	RBLP	20.0981	-90.6091	3	CC5.8	R1	22	14_39	39	0.0822588	5Y 7/1	15.64	4.88189	8.64237	2.69763
2017	Gulf of Mexico	Mexico	Campeche	RBLP	20.0981	-90.6091	3	CC5.8	R2	22	14_39	39	0.0490734	5Y 8/1	8.13522	4.07521	7.53531	3.77469
2017	Gulf of Mexico	Mexico	Campeche	RBLP	20.1875	-90.5307	3	CC7.2	R1	10	0_10	23	0.529101	10YR 7/1	48.5737	20.8988	9.18042	3.94988
2017	Gulf of Mexico	Mexico	Campeche	RBLP	20.1875	-90.5307	3	CC7.2	R2	10	0_10	23	0.537589	10YR 7/1	53.4838	16.8098	9.94884	3.12689
2017	Gulf of Mexico	Mexico	Campeche	RBLP	20.1875	-90.5307	3	CC7.2	R1	13	10_23	23	0.0125009	2.5Y 7/2	1.23701	0.616842	7.61184	3.79569
2017	Gulf of Mexico	Mexico	Campeche	RBLP	20.1875	-90.5307	3	CC7.2	R2	13	10_23	23	0.646412	2.57/3	72.4338	26.3047	8.61963	3.13026
2017	Gulf of Mexico	Mexico	Campeche	RBLP	20.0961	-90.4964	3	C5.2	R1	10	0_10	20	0.357982	2.5Y 8/1	32.9974	11.5714	9.2176	3.2324
2017	Gulf of Mexico	Mexico	Campeche	RBLP	20.0961	-90.4964	3	C5.2	R2	10	0_10	20	0.18234	10YR 7/1	19.9759	3.41831	10.9553	1.87469
2017	Gulf of Mexico	Mexico	Campeche	RBLP	20.0961	-90.4964	3	C5.2	R2	10	10_20	20	0.437273	10YR 8/1	38.1486	12.0941	8.72421	2.76579
2017	Gulf of Mexico	Mexico	Campeche	RBLP	20.0961	-90.4964	3	C5.2	R2	10	10_20	20	0.437273	10YR 8/1	38.1486	12.0941	8.72421	2.76579
2017	Gulf of Mexico	Mexico	Campeche	RBLP	19.9424	-90.5203	3	CC2.5	R1	20	0_20	30	0.887021	10YR 8/1	162.779	51.7248	9.17561	2.91565
2017	Gulf of Mexico	Mexico	Campeche	RBLP	19.9424	-90.5203	3	CC2.5	R2	20	0_20	30	0.954141	2.5 7/1	157.154	70.7074	8.23537	3.70529
2017	Gulf of Mexico	Mexico	Campeche	RBLP	19.9424	-90.5203	3	CC2.5	R1	10	20_30	30	0.0135529	10YR 7/1	1.03419	0.478712	7.63078	3.53217
2017	Gulf of Mexico	Mexico	Campeche	RBLP	19.9424	-90.5203	3	CC2.5	R2	10	20_30	30	0.839393	10YR 7/1	64.8596	28.8099	7.72697	3.43223
2017	Gulf of Mexico	Mexico	Campeche	RBLP	19.9001	-90.5125	3	C1.5	R1	17	0-10	42	0.459364	2.5Y 7/1	68.9154	19.8536	8.82492	2.54234
2017	Gulf of Mexico	Mexico	Campeche	RBLP	19.9001	-90.5125	3	C1.5	R2	10	0_10	42	0.636618	10YR 8/1	51.6943	20.4271	8.12014	3.20869
2017	Gulf of Mexico	Mexico	Campeche	RBLP	19.9001	-90.5125	3	C1.5	R1	8	10_20	42	0.813457	10 YR 6/2	57.5644	17.8954	8.84564	2.7499
2017	Gulf of Mexico	Mexico	Campeche	RBLP	19.9001	-90.5125	3	C1.5	R2	10	10_20	42	0.0661376	2.5Y 7/1	5.37163	2.15465	8.12191	3.25783
2017	Gulf of Mexico	Mexico	Campeche	RBLP	19.9001	-90.5125	3	C1.5	R1	17	20_42	42	0.818866	10 YR 6/2	118.473	38.4367	8.51058	2.76111
2017	Gulf of Mexico	Mexico	Campeche	RBLP	19.9001	-90.5125	3	C1.5	R2	22	20_42	42	0.0662555	10YR 7/1	11.5658	4.67859	7.93472	3.20974
2017	Gulf of Mexico	Mexico	Campeche	RBLP	19.9428	-90.5379	3	CC2.7	R1	14	0-14	36	0.483358	2.5Y 6/1	67.9534	19.3141	10.0419	2.85415
2017	Gulf of Mexico	Mexico	Campeche	RBLP	19.9428	-90.5379	3	CC2.7	R2	14	0_14	36	0.357719	2.5Y 6/2	47.9378	18.1399	9.57211	3.62213
2017	Gulf of Mexico	Mexico	Campeche	RBLP	19.9428	-90.5379	3	CC2.7	R1	24	14_36	36	0.844357	5Y 6/2	189.271	77.2023	9.34	3.80972
2017	Gulf of Mexico	Mexico	Campeche	RBLP	19.9428	-90.5379	3	CC2.7	R2	24	14_36	36	0.95557	2.5Y 7/1	195.62	81.002	8.52983	3.53201
2017	Gulf of Mexico	Mexico	Campeche	RBLP	19.9419	-90.4916	3	CC2.3	R1	15	0-15	32	0.364287	2.5Y 7/1	69.8017	22.8318	12.7741	4.17834
2017	Gulf of Mexico	Mexico	Campeche	RBLP	19.9419	-90.4916	3	CC2.3	R2	15	0-15	32	0.950683	2.5Y 8/1	54.8557	106.998	3.84676	7.50324
2017	Gulf of Mexico	Mexico	Campeche	RBLP	19.9419	-90.4916	3	CC2.3	R1	17	15_32	32	0.643692	2.5Y 7/1	88.5871	33.8433	8.0955	3.09276
2017	Gulf of Mexico	Mexico	Campeche	RBLP	19.9419	-90.4916	3	CC2.3	R2	17	15_32	32	0.449378	2.5Y 7/2	66.5988	14.4922	8.71778	1.89703
2017	Gulf of Mexico	Mexico	Campeche	RBLP	20.4493	-90.5508	3	CC12.3	R1	8	0_8	37	0.0364429	2.5Y 7/1	2.40821	1.29439	8.26021	4.43979
2017	Gulf of Mexico	Mexico	Campeche	RBLP	20.4493	-90.5508	3	CC12.3	R2	8	0_8	37	0.410265	2.5Y 5/1	27.6712	15.0948	8.4309	4.5991
2017	Gulf of Mexico	Mexico	Campeche	RBLP	20.4493	-90.5508	3	CC12.3	R1	22	15_37	37	0.0120722	2.5Y 6/2	2.41406	1.0253	9.0895	3.8605
2017	Gulf of Mexico	Mexico	Campeche	RBLP	20.4493	-90.5508	3	CC12.3	R2	22	15_37	37	0.710497	2.5Y 6/2	130.764	75.0953	8.36573	4.80427
2017	Gulf of Mexico	Mexico	Campeche	RBLP	20.1387	-90.5697	3	CC6.5	R1	15	0_15	27	0.0148827	2.5Y 7/1	1.90101	0.858248	8.5155	3.8445
2017	Gulf of Mexico	Mexico	Campeche	RBLP	20.1387	-90.5697	3	CC6.5	R2	15	0_15	27	0.912958	2.5Y 8/1	110.084	64.2457	8.0386	4.6914
2017	Gulf of Mexico	Mexico	Campeche	RBLP	20.1387	-90.5697	3	CC6.5	R1	12	15_27	27	0.0100058	2.5Y 7/2	1.02485	0.408789	8.53541	3.40459
2017	Gulf of Mexico	Mexico	Campeche	RBLP	20.1387	-90.5697	3	CC6.5	R2	12	15_27	27	0.0128738	2.5Y 8/1	1.26332	0.547252	8.17759	3.54241
2017	Gulf of Mexico	Mexico	Campeche	RBLP	19.9905	-90.4967	3	CC17	R1	15	0_15	24	0.786351	5Y 6/1, 5Y 6/2	82.3499	47.623	6.98161	4.03747
2017	Gulf of Mexico	Mexico	Campeche	RBLP	19.9905	-90.4967	3	CC17	R2	15	0_15	24	0.418301	5Y 8/1, 5Y 7/1	48.2346	26.3724	7.68739	4.20309
2017	Gulf of Mexico	Mexico	Campeche	RBLP	19.9905	-90.4967	3	CC17	R1	9	15_24	24	0.0157995	5Y 8/1	0.996177	0.456916	7.00571	3.2133
2017	Gulf of Mexico	Mexico	Campeche	RBLP	19.9905	-90.4967	3	CC17	R2	9	15_24	24	0.00588518	5Y 8/1,5Y 7/1	0.457724	0.146189	8.64173	2.76001
2017	Gulf of Mexico	Mexico	Campeche	RBLP	19.9903	-90.5569	3	CC21	R1	14	0_14	29	0.526756	5Y 8/1	55.4443	31.0596	7.51829	4.21171
2017	Gulf of Mexico	Mexico	Campeche	RBLP	19.9903	-90.5569	3	CC21	R2	14	0_14	29	0.181083	5Y 8/1, 5Y 7/1	23.6092	11.1985	9.31273	4.41727
2017	Gulf of Mexico	Mexico	Campeche	RBLP	19.9903	-90.5569	3	CC21	R1	15	14_29	29	0.0126305	5Y 7/1, 5Y 7/2	1.51228	0.651329	7.98214	3.43786
2017	Gulf of Mexico	Mexico	Campeche	RBLP	19.9903	-90.5569	3	CC21	R2	15	14_29	29	0.496331	5Y 8/1	56.1854	31.2929	7.54677	4.20323
2017	Gulf of Mexico	Mexico	Campeche	RBLP	19.9911	-90.5181	3	CC20	R1	11	0_11	19	0.518555	5Y 7/1, 5Y8/1	47.4075	26.5177	8.31112	4.64888
2017	Gulf of Mexico	Mexico	Campeche	RBLP	19.9911	-90.5181	3	CC20	R1	11	0_11	19	0.518555	5Y 7/1, 5Y8/1	47.4075	26.5177	8.31112	4.64888
2017	Gulf of Mexico	Mexico	Campeche	RBLP	19.9911	-90.5181	3	CC20	R1	9	11_20	19	0.845429	5Y 7/1	61.8926	35.9573	8.13428	4.72572
2017	Gulf of Mexico	Mexico	Campeche	RBLP	19.9911	-90.5181	3	CC20	R2	9	11_20	20	0.40307	5Y 8/1	25.2909	14.6493	6.97174	4.03826
2018	Gulf of Mexico	Mexico	Campeche	RBLP	20.2117	-90.601	4	C2	R1	10	0_10	77	0.0775934	2.5Y 7/1	8.45572	3.47814	10.8975	4.48252
2018	Gulf of Mexico	Mexico	Campeche	RBLP	20.2117	-90.601	4	C2	R2	10	0_10	77	0.183402	2.5Y 7/1	17.174	6.53998	9.36408	3.56592
2018	Gulf of Mexico	Mexico	Campeche	RBLP	20.2117	-90.601	4	C2	R1	10	10_20	77	0.0784751	2.5Y 5/1	12.5849	2.18413	16.0368	2.78321
2018	Gulf of Mexico	Mexico	Campeche	RBLP	20.2117	-90.601	4	C2	R2	10	10_20	77	0.0864108	2.5Y 5/1	13.9134	1.78742	16.1015	2.06851
2018	Gulf of Mexico	Mexico	Campeche	RBLP	20.2117	-90.601	4	C2	R1	15	20_35	77	0.150778	5Y 6/1	23.2738	8.36701	10.2905	3.69948
2018	Gulf of Mexico	Mexico	Campeche	RBLP	20.2117	-90.601	4	C2	R2	15	20_35	77	0.295384	5Y 6/1	29.364	10.2913	6.6273	2.3227
2018	Gulf of Mexico	Mexico	Campeche	RBLP	20.2117	-90.601	4	C2	R1	10	35_45	77	0.371214	5Y 7/1	32.5467	12.7414	8.76765	3.43235
2018	Gulf of Mexico	Mexico	Campeche	RBLP	20.2117	-90.601	4	C2	R2	10	35_45	77	0.417064	5Y 7/1	40.6392	15.7062	9.7441	3.7659
2018	Gulf of Mexico	Mexico	Campeche	RBLP	20.2117	-90.601	4	C2	R1	15	45_60	77	0.274222	5Y 6/1	45.957	15.6196	11.1727	3.79731
2018	Gulf of Mexico	Mexico	Campeche	RBLP	20.2117	-90.601	4	C2	R2	15	45_60	77	0.335944	5Y 6/1	44.2734	15.2894	8.78588	3.03412
2018	Gulf of Mexico	Mexico	Campeche	RBLP	20.2117	-90.601	4	C2	R1	17	60_77	77	0.586359	5Y 7/1	89.7349	36.561	9.0022	3.6678
2018	Gulf of Mexico	Mexico	Campeche	RBLP	20.2117	-90.601	4	C2	R2	17	60_77	77	0.674533	5Y 7/1	94.4965	41.8469	8.24069	3.64931
2018	Gulf of Mexico	Mexico	Campeche	RBLP	20.0207	-90.5947	4	CEP4	R1	15	0_15	31	0.149984	2.5Y 7/1	11.9073	6.78822	5.2927	3.0173
2018	Gulf of Mexico	Mexico	Campeche	RBLP	20.0207	-90.5947	4	CEP4	R2	15	0_15	31	0.178288	2.5Y 7/1	22.3774	11.3458	8.3675	4.2425
2018	Gulf of Mexico	Mexico	Campeche	RBLP	20.0207	-90.5947	4	CEP4	R1	16	15_31	31	0.235425	2.5Y 7/1	29.0461	17.9636	7.71107	4.76893
2018	Gulf of Mexico	Mexico	Campeche	RBLP	20.0207	-90.5947	4	CEP4	R2	16	15_31	31	0.37139	2.5Y 7/1	36.0826	22.7456	6.07222	3.82778
2017	Gulf of Mexico	Mexico	Campeche	RBLP	19.9458	-90.5686	4	CC2.8	R1	15	0_15	30	0.328967	10YR 7/2	36.3324	20.5639	7.36294	4.16738
2017	Gulf of Mexico	Mexico	Campeche	RBLP	19.9458	-90.5686	4	CC2.8	R1	15	0_15	30	0.620295	10YR 7/2	64.641	38.8577	6.94734	4.17627
2017	Gulf of Mexico	Mexico	Campeche	RBLP	19.9458	-90.5686	4	CC2.8	R1	15	15_30	30	0.268304	10YR 7/2	27.256	16.7226	6.77242	4.15514
2017	Gulf of Mexico	Mexico	Campeche	RBLP	19.9458	-90.5686	4	CC2.8	R2	15	15_30	30	0.182053	10YR 7/2	18.1343	11.399	6.64068	4.17425
2017	Gulf of Mexico	Mexico	Campeche	RBLP	19.9438	-90.5735	4	CC2.9	R1	14	0_14	48	0.641334	2.5Y 7/2	71.1995	36.0059	7.92985	4.01015
2017	Gulf of Mexico	Mexico	Campeche	RBLP	19.9438	-90.5735	4	CC2.9	R2	14	0_14	48	0.0113581	5Y 8/1	1.3983	0.52417	8.7936	3.2964
2017	Gulf of Mexico	Mexico	Campeche	RBLP	19.9438	-90.5735	4	CC2.9	R1	16	14_30	48	0.0119616	2.5Y 7/2	1.46703	0.802806	7.66529	4.19471
2017	Gulf of Mexico	Mexico	Campeche	RBLP	19.9438	-90.5735	4	CC2.9	R2	16	14_30	48	0.0146599	5Y 8/1	1.91741	0.801121	8.17456	3.41544
2017	Gulf of Mexico	Mexico	Campeche	RBLP	19.9438	-90.5735	4	CC2.9	R1	8	30_48	48	0.013328	2.5Y 8/1	0.920353	0.336747	8.63174	3.15826
2017	Gulf of Mexico	Mexico	Campeche	RBLP	19.9438	-90.5735	4	CC2.9	R2	8	30_48	48	0.0183598	5Y 8/1	1.25506	0.41641	8.54492	2.83508
2017	Gulf of Mexico	Mexico	Campeche	RBLP	19.9018	-90.5915	4	CC1.8	R1	15	0-15	30	0.295068	5Y 7/1	32.7528	15.7563	7.40006	3.55994
2017	Gulf of Mexico	Mexico	Campeche	RBLP	19.9018	-90.5915	4	CC1.8	R2	15	0_15	30	0.124494	2.5Y 7/1	14.4148	7.02315	7.7191	3.7609
2017	Gulf of Mexico	Mexico	Campeche	RBLP	19.9018	-90.5915	4	CC1.8	R1	15	15_30	30	0.0457557	5Y 8/1	5.05453	2.53634	7.36452	3.69548
2017	Gulf of Mexico	Mexico	Campeche	RBLP	19.9018	-90.5915	4	CC1.8	R2	15	15_30	30	0.0620962	2.5Y 8/1	6.74609	3.56499	7.24262	3.82738
2017	Gulf of Mexico	Mexico	Campeche	RBLP	19.9007	-90.5592	4	CC1.7	R1	15	0_15	45	0.398004	5Y 7/1	46.3657	19.4744	7.76637	3.26201
2017	Gulf of Mexico	Mexico	Campeche	RBLP	19.9007	-90.5592	4	CC1.7	R2	15	0_15	45	0.697922	2.5Y 7/1	92.3788	23.4221	8.82417	2.23732
2017	Gulf of Mexico	Mexico	Campeche	RBLP	19.9007	-90.5592	4	CC1.7	R1	15	15_30	45	0.507408	2.5Y 71	62.2169	25.7874	8.17447	3.38812
2017	Gulf of Mexico	Mexico	Campeche	RBLP	19.9007	-90.5592	4	CC1.7	R2	15	15-30	45	0.743193	2.5Y 7/1	99.9302	29.8557	8.96404	2.67814
2017	Gulf of Mexico	Mexico	Campeche	RBLP	19.9007	-90.5592	4	CC1.7	R1	15	30_45	45	0.639448	5Y 7/1	87.8322	34.5588	9.15709	3.60299
2017	Gulf of Mexico	Mexico	Campeche	RBLP	19.9007	-90.5592	4	CC1.7	R2	15	30_45	45	0.513337	2.5Y 7/1	72.4904	22.0424	9.41427	2.86263
2017	Gulf of Mexico	Mexico	Campeche	RBLP	20.0444	-90.588	4	CC4.5	R1	12	0_12	26	0.169765	2.5Y 5/2	21.2711	8.83843	10.4414	4.33856
2017	Gulf of Mexico	Mexico	Campeche	RBLP	20.0444	-90.588	4	CC4.5	R2	12	0_12	26	0.572956	2.5Y 7/2	70.8522	22.5856	10.3051	3.28494
2017	Gulf of Mexico	Mexico	Campeche	RBLP	20.0444	-90.588	4	CC4.5	R1	14	12_26	26	0.772026	2.5Y 6/2	96.2421	42.7535	8.90441	3.95559
2017	Gulf of Mexico	Mexico	Campeche	RBLP	20.0444	-90.588	4	CC4.5	R2	14	12_26	26	0.115546	2.5Y 8/1	14.9677	4.75143	9.25275	2.93725
2017	Gulf of Mexico	Mexico	Campeche	RBLP	19.9435	-90.592	4	CC2.1	R1	5	0_5	27	0.729989	2.5Y 7/1	38.2177	12.1515	10.4708	3.32923
2017	Gulf of Mexico	Mexico	Campeche	RBLP	19.9435	-90.592	4	CC2.1	R2	5	0_5	27	0.317765	2.5Y 7/1	14.635	4.129	9.21122	2.59878
2017	Gulf of Mexico	Mexico	Campeche	RBLP	19.9435	-90.592	4	CC2.1	R1	22	5_27	27	0.0442197	2.5Y 7/1	10.1779	2.17711	10.4621	2.2379
2017	Gulf of Mexico	Mexico	Campeche	RBLP	19.9435	-90.592	4	CC2.1	R2	22	5_27	27	0.0457557	2.5Y 7/1	9.71297	2.68864	9.64905	2.67095
2017	Gulf of Mexico	Mexico	Campeche	RBLP	19.9902	-90.5904	4	CC24	R1	14	0_14	27	0.436538	5Y 7/1, 5Y 7/2	49.2956	21.3538	8.06599	3.49401
2017	Gulf of Mexico	Mexico	Campeche	RBLP	19.9902	-90.5904	4	CC24	R2	14	0_14	27	0.644489	5Y 7/1	77.1758	37.1437	8.55338	4.11662
2017	Gulf of Mexico	Mexico	Campeche	RBLP	19.9902	-90.5904	4	CC24	R1	13	14_27	27	0.0101546	5Y 7/1, 5Y 7/2	0.988991	0.535714	7.49184	4.05816
C	Gulf of Mexico	Mexico	Campeche	RBLP	19.9902	-90.5904	4	CC24	R2	13	14_27	27	0.0511489	5Y 6/1, 5Y 6/2	4.79122	2.95527	7.20554	4.44446
2017	Gulf of Mexico	Mexico	Campeche	RBLP	19.9932	-90.5903	4	CC23	R1	12	0_12	28	0.475342	5Y 6/2	47.856	21.2206	8.38976	3.72024
2017	Gulf of Mexico	Mexico	Campeche	RBLP	19.9932	-90.5903	4	CC23	R2	12	0_12	28	0.390459	5Y 7/1, 5Y 6/1	37.4188	15.7149	7.98606	3.35394
2017	Gulf of Mexico	Mexico	Campeche	RBLP	19.9932	-90.5903	4	CC23	R2	16	12_28	28	0.640256	5Y 7/1	84.35	40.5256	8.234	3.956
2017	Gulf of Mexico	Mexico	Campeche	RBLP	19.9932	-90.5903	4	CC23	R2	16	12_28	28	0.0683587	5Y 6/1, 5Y 5/1	8.12749	4.74581	7.43093	4.33907
2018	Gulf of Mexico	Mexico	Campeche	RBLP	20.1917	-90.5899	4	CCC3	R1	22	0_22	22	0.522315	2.5Y 7/1	29.1055	16.0412	6.63383	3.65617
2018	Gulf of Mexico	Mexico	Campeche	RBLP	20.1917	-90.5899	4	CCC3	R2	22	0_22	22	0.499605	2.5Y 7/1	7.79577	4.04658	2.69243	1.39757
2018	Gulf of Mexico	Mexico	Campeche	RBLP	20.3935	-90.6059	5	CCIA7	R1	15	0_15	45	0.292496	2.5Y 7/1	52.5713	30.1725	5.73721	3.29279
2018	Gulf of Mexico	Mexico	Campeche	RBLP	20.3935	-90.6059	5	CCIA7	R2	15	0_15	45	0.193029	2.5Y 7/1	34.9085	18.9712	3.80964	2.07036
2018	Gulf of Mexico	Mexico	Campeche	RBLP	20.3935	-90.6059	5	CCIA7	R1	15	15_30	45	0.610881	2.5Y 8/1	10.2745	5.8149	1.59588	0.903202
2018	Gulf of Mexico	Mexico	Campeche	RBLP	20.3935	-90.6059	5	CCIA7	R2	15	15_30	45	0.610881	2.5Y 8/1	41.2526	22.7461	5.60144	3.08856
2018	Gulf of Mexico	Mexico	Campeche	RBLP	20.3935	-90.6059	5	CCIA7	R1	15	30_45	45	0.429206	2.5Y 8/1	84.6153	58.0238	7.64651	5.24349
2018	Gulf of Mexico	Mexico	Campeche	RBLP	20.3935	-90.6059	5	CCIA7	R2	15	30_45	45	0.490976	2.5Y 8/1	80.0113	32.8106	6.64291	2.72409
2018	Gulf of Mexico	Mexico	Campeche	RBLP	20.3605	-90.6484	5	CCIA6	R1	25	0_25	25	0.442635	2.5Y 8/1	41.4983	26.3478	6.85663	4.35337
2018	Gulf of Mexico	Mexico	Campeche	RBLP	20.3605	-90.6484	5	CCIA6	R2	25	0_25	25	0.481784	2.5Y 8/1	31.0427	19.1807	6.6754	4.1246
2018	Gulf of Mexico	Mexico	Campeche	RBLP	20.3616	-90.617	5	CCIA5	R1	15	0_15	29	0.403485	2.5Y 7/1	35.3704	24.5381	7.71072	5.34928
2018	Gulf of Mexico	Mexico	Campeche	RBLP	20.3616	-90.617	5	CCIA5	R2	15	0_15	29	0.310021	2.5Y 7/1	34.608	23.6799	7.81365	5.34635
2018	Gulf of Mexico	Mexico	Campeche	RBLP	20.3616	-90.617	5	CCIA5	R1	14	15_29	29	0.327656	2.5Y 7/1	85.1637	51.3485	7.41139	4.46861
2018	Gulf of Mexico	Mexico	Campeche	RBLP	20.3616	-90.617	5	CCIA5	R2	14	15_29	29	0.316369	2.5Y 7/1	80.8767	46.9523	7.35824	4.27176
2017	Gulf of Mexico	Mexico	Campeche	RBLP	19.9672	-90.6175	5	CCVA08	R1	24	0_24	24	0.10814	2.5Y 8/1	17.5886	10.6409	6.77694	4.09997
2017	Gulf of Mexico	Mexico	Campeche	RBLP	19.9672	-90.6175	5	CCVA08	R2	24	0_24	24	0.0735648	5YR 7/1	12.3336	7.26614	6.98567	4.1155
2017	Gulf of Mexico	Mexico	Campeche	RBLP	20.5106	-90.5582	5	CC13.6	R1	17	0_17	26	0.0540014	10YR 5/1	6.02945	3.80209	6.56786	4.14161
2017	Gulf of Mexico	Mexico	Campeche	RBLP	20.5106	-90.5582	5	CC13.6	R2	17	0_17	26	0.802222	2.5Y 8/1	81.5285	55.8384	5.97813	4.09439
2017	Gulf of Mexico	Mexico	Campeche	RBLP	20.5106	-90.5582	5	CC13.6	R1	12	17_26	26	0.0638639	10YR 7/2	4.75677	3.1696	6.2069	4.13587
2017	Gulf of Mexico	Mexico	Campeche	RBLP	20.5106	-90.5582	5	CC13.6	R2	12	17_26	26	0.157818	5Y 8/1	11.7483	7.78227	6.20351	4.1093
2017	Gulf of Mexico	Mexico	Campeche	RBLP	20.5102	-90.5627	5	CC13.7	R1	15	0-15	26	0.392345	10YR 7/1	58.3437	11.4546	9.91366	1.94634
2017	Gulf of Mexico	Mexico	Campeche	RBLP	20.5102	-90.5627	5	CC13.7	R2	15	0_15	26	0.520612	2.5Y 7/1	69.3832	24.7174	8.88483	3.16517
2017	Gulf of Mexico	Mexico	Campeche	RBLP	20.5102	-90.5627	5	CC13.7	R1	11	15_26	26	0.16174	2.5Y 7/1	13.8386	6.39021	7.77825	3.59175
2017	Gulf of Mexico	Mexico	Campeche	RBLP	20.5102	-90.5627	5	CC13.7	R2	11	15_26	26	0.27327	2.5Y 8/2	26.3349	8.56438	8.76088	2.84912
2017	Gulf of Mexico	Mexico	Campeche	RBLP	20.4514	-90.5653	5	CC12.4	R1	16	0_16	43	0.286478	2.5Y 7/1	39.773	15.1391	8.67715	3.30285
2017	Gulf of Mexico	Mexico	Campeche	RBLP	20.4514	-90.5653	5	CC12.4	R2	16	0_16	43	0.27351	5Y 7/2	39.9997	12.5143	9.14035	2.85965
2017	Gulf of Mexico	Mexico	Campeche	RBLP	20.4514	-90.5653	5	CC12.4	R1	9	16_25	43	0.0163163	5Y 7/1	1.50627	0.63916	10.2574	4.35257
2017	Gulf of Mexico	Mexico	Campeche	RBLP	20.4514	-90.5653	5	CC12.4	R2	9	16_25	43	0.0103368	2.5Y 8/1	0.753045	0.379144	8.09454	4.07546
2017	Gulf of Mexico	Mexico	Campeche	RBLP	20.4514	-90.5653	5	CC12.4	R1	18	25_43	43	0.0304364	2.5Y 8/1	4.74409	1.88496	8.65939	3.44061
2017	Gulf of Mexico	Mexico	Campeche	RBLP	20.4514	-90.5653	5	CC12.4	R2	18	25_43	43	0.0194098	2.5Y 8/1	2.70312	1.3741	7.73698	3.93302
2017	Gulf of Mexico	Mexico	Campeche	RBLP	20.1856	-90.6026	5	CC7.3	R1	10	0_10	20	0.477857	2.5Y 7/2	44.9652	14.2413	9.40976	2.98024
2017	Gulf of Mexico	Mexico	Campeche	RBLP	20.1856	-90.6026	5	CC7.3	R2	10	0_10	20	0.803554	2.5Y 7/2	64.4411	38.8155	8.01952	4.83048
2017	Gulf of Mexico	Mexico	Campeche	RBLP	20.1856	-90.6026	5	CC7.3	R1	10	10_20	20	0.0220694	5Y 6/2	2.28793	0.528134	10.3669	2.39306
2017	Gulf of Mexico	Mexico	Campeche	RBLP	20.1856	-90.6026	5	CC7.3	R2	10	10_20	20	0.0284199	2.5Y 8/1	2.79528	1.24603	9.83565	4.38435

## Sheet: Isotope
DEPTH	D13c	D15N	Año	Lat	Lon	Country	Location	Depth	d13C	d15N
1	-18.2	1.57	2018	19.9423	-90.4618	Mexico	RBLP	1	-18.28	1.57
1	-24.39	3.74	2018	19.9423	-90.4618	Mexico	RBLP	1	-18.17	1.55
1	-14.35	5.57	2018	20.136	-90.4767	Mexico	RBLP	1	-24.39	3.74
2	-18.97	3.95	2018	20.136	-90.4767	Mexico	RBLP	1	-24.46	4.18
2	-19.42	4.58	2018	20.5089	-90.4979	Mexico	RBLP	1	-14.35	5.57
2	-10.74	3.41	2018	20.0489	-90.4853	Mexico	RBLP	1	-23.52	3.74
3	-15.94	1.35	2018	19.9276	-90.4772	Mexico	RBLP	2	-18.97	3.95
3	-12.98	3.68	2018	19.9276	-90.4772	Mexico	RBLP	2	-18.79	3.2
4	-16.06	3.26	2018	20.1363	-90.4901	Mexico	RBLP	2	-19.42	4.58
4	-16.4	3	2018	20.1363	-90.4901	Mexico	RBLP	2	-19.2	4.36
5	-15.05	0.25	2018	20.5064	-90.5058	Mexico	RBLP	2	-10.74	3.41
5	-12.97	4.06	2018	19.9367	-90.5079	Mexico	RBLP	3	-16.14	1.34
			2018	19.9367	-90.5079	Mexico	RBLP	3	-15.94	1.35
			2017	20.1388	-90.5513	Mexico	RBLP	3	-18.35	4.04
			2018	20.5098	-90.5132	Mexico	RBLP	3	-12.98	3.68
			2018	20.5098	-90.5132	Mexico	RBLP	3	-15.03	3.82
			2017	19.9672	-90.6175	Mexico	RBLP	4	-16.06	3.26
			2018	20.2117	-90.601	Mexico	RBLP	4	-16	3
			2018	20.2117	-90.601	Mexico	RBLP	4	-16.4	3
			2018	20.5066	-90.538	Mexico	RBLP	4	-16.91	4
			2018	19.9666	-90.6342	Mexico	RBLP	5	-15	0.25
			2018	20.5102	-90.5627	Mexico	RBLP	5	-15.05	3.91
			2018	20.5102	-90.5627	Mexico	RBLP	5	-12.97	4.06
			2018	20.2471	-90.6259	Mexico	RBLP	5	-13.85	2.6
						Mexico	RBLP
						Mexico	RBLP
						Mexico	RBLP
						Mexico	RBLP
						Mexico	RBLP
						Mexico	RBLP
						Mexico	RBLP

## Sheet: METADATA
Region	Geographic region. Attributes: Gulf of Mexico
Country	Country where samples were collected
Location	Name of the water body or coastal town closest to where the sampling was done.
Station	Sampling Station
Lat	Location of the body of water. Latitude. They are presented in decimal degrees
Lon	Location of the body of water. Longitude. They are presented in decimal degrees
Water Depth	Water depth (m)
Tt AV	Aboveground biomass : Thalassia testudinum (g Dwm2)
Tt BW	Belowground biomass :Thalassia testudinum (g Dwm2)
SfAV	Aboveground biomass :Syringodium filiforme (g Dwm2)
SfBW	Belowground biomass :Syringodium filiforme (g Dwm2)
HwAV	Aboveground biomass : Halodule wrightii (g Dwm2)
HwBw	Belowground biomass : Halodule wrightii(g Dwm2)
TtL	Leaf length : Thalassia testudinum (cm)
TtW	Leaf wide: Thalassia testudinum (cm)
#Leave	Number of leaves by shoot: Thalassia testudinum (cm)
SfL	Leaf length : Syringodium filiforme (cm)
HwL	Leaf length : Halodule wrightii (cm)
TtD	Shot density :Thalassia testudinum
SfD	Shot density :Syringodium filiforme
HwD	Shot density:Halodule wrightii
TtvC	Coverage:Thalassia testudinum (%)
HwC	Coverage: :Syringodium filiforme (%)
SfC	Coverage:Halodule wrightii (%)
MaC	Macroalgae Coverage (%)
LAI	Leaf Area Index
Temp	Temperature is the specific heat degree of the body of water. Obtaining average values, ranges or maxima. Units ° C.
OD	Dissolved oxygen in water (mg l-1)
SAL	Salinity is the proportional amount of salts contained in seawater and coastal bodies of water. Obtaining average values.
NO3+NO2	Nitrates and nitrites measured in water (µmol l-1)
NH4+	Ammonium measured in water (µmol l-1)
SRP	Soluble reactive phosphate measured in water (µmol l-1)
SRS	Soluble reactive silicate measured in water (µmol l-1)
Cla	concentration of chlorophyll-a (µg l-1)
TRIX	Trophic level index
Meadow	Meadow type: monospecific meadows of Thalassia testudinum (TtMa), mixing seagrass meadows (T. testudinum, S. filiforme, H. wrightii) with macroalgae (MxMa), mixing meadows dominated by Syringodium fliforme (MxSf), and Syringodium filiforme and Thalassia testudinum beds (SfTt).
Corg Mgha TOP	It is the amount of organic carbon in Megagram of carbon per hectare that seagrasses contain in a sediment (top 1 m).
Cing Mgha TOP	It is the amount of inorganic carbon in Megagram of carbon per hectare that seagrasses contain in a sediment (top 1 m).
Corg %	It is the amount of organic carbon in percentaje that seagrasses contain in a sediment .
Cing %	It is the amount of inorganic carbon in percentaje that seagrasses contain in a sediment .
ID_Core	Identifier of the analyzed core
Replicate	Replica of the section core
L-Section	Length of the core section (cm)
Secction	Range of the analyzed core section
L_total	Total core length (cm)
BD	Bulk density (g cm3)
Munsell Color	Sediment color on the Munsell scale
Corg Mgha	It is the amount of organic carbon in Megagram of carbon per hectare that seagrasses contain in a sediment .
Cing Mgha	It is the amount of inorganic carbon in Megagram of carbon per hectare that seagrasses contain in a sediment .
d13C	values ​​of the d13C isotopes in parts per thousand
d15N	values ​​of the d15N isotopes in parts per thousand
Region
Country
Location
Station
Lat
Lon
Water Depth
Tt AV gDwm2
Tt BW gDwm2
SfAV gDwm2
SfBW gDwm2
HwAV gDwm2
HwBw gDwm2
TtL
TtW
#Leave
SfL
HwL
TtD
SfD
HwD
TtvC
HwC
SfC
MaC
IAF
Temp
OD
SAL
NO3+NO2
NH4+
SRP
SRS
Cla
TRIX
Meadow
Corg Mgha TOP
Cing Mgha TOP
Corg %
Cing %
Region
Country
Location
Station
Lat
Lon
Water Depth
Tt AV gDwm2
Tt BW gDwm2
SfAV gDwm2
SfBW gDwm2
HwAV gDwm2
HwBw gDwm2
TtL
TtW
#Leave
SfL
HwL
TtD
SfD
HwD
TtvC
HwC
SfC
MaC
IAF
Temp
OD
SAL
NO3+NO2
NH4+
SRP
SRS
Cla
TRIX
Meadow
Corg Mgha TOP
Cing Mgha TOP
Corg %
Cing %
Region
Country
Location
Station
Lat
Lon
Water Depth
Tt AV gDwm2
Tt BW gDwm2
SfAV gDwm2
SfBW gDwm2
HwAV gDwm2
HwBw gDwm2
TtL
TtW
#Leave
SfL
HwL
TtD
SfD
HwD
TtvC
HwC
SfC
MaC
IAF
Temp
OD
SAL
NO3+NO2
NH4+
SRP
SRS
Cla
TRIX
Meadow
Corg Mgha TOP
Cing Mgha TOP
Corg %
Cing %
Region
Country
Location
Station
Lat
Lon
Water Depth
Tt AV gDwm2
Tt BW gDwm2
SfAV gDwm2
SfBW gDwm2
HwAV gDwm2
HwBw gDwm2
TtL
TtW
#Leave
SfL
HwL
TtD
SfD
HwD
TtvC
HwC
SfC
MaC
IAF
Temp
OD
SAL
NO3+NO2
NH4+
SRP
SRS
Cla
TRIX
Meadow
Corg Mgha TOP
Cing Mgha TOP
Corg %
Cing %
Region
Country
Location
Station
Lat
Lon
Water Depth
Tt AV gDwm2
Tt BW gDwm2
SfAV gDwm2
SfBW gDwm2
HwAV gDwm2
HwBw gDwm2
TtL
TtW
#Leave
SfL
HwL
TtD
SfD
HwD
TtvC
HwC
SfC
MaC
IAF
Temp
OD
SAL
NO3+NO2
NH4+
SRP
SRS
Cla
TRIX
Meadow
Corg Mgha TOP
Cing Mgha TOP
Corg %
Cing %
Region
Country
Location
Station
Lat
Lon
Water Depth
Tt AV gDwm2
Tt BW gDwm2
SfAV gDwm2
SfBW gDwm2
HwAV gDwm2
HwBw gDwm2
TtL
TtW
#Leave
SfL
HwL
TtD
SfD
HwD
TtvC
HwC
SfC
MaC
IAF
Temp
OD
SAL
NO3+NO2
NH4+
SRP
SRS
Cla
TRIX
Meadow
Corg Mgha TOP
Cing Mgha TOP
Corg %
Cing %
Region
Country
Location
Station
Lat
Lon
Water Depth
Tt AV gDwm2
Tt BW gDwm2
SfAV gDwm2
SfBW gDwm2
HwAV gDwm2
HwBw gDwm2
TtL
TtW
#Leave
SfL
HwL
TtD
SfD
HwD
TtvC
HwC
SfC
MaC
IAF
Temp
OD
SAL
NO3+NO2
NH4+
SRP
SRS
Cla
TRIX
Meadow
Corg Mgha TOP
Cing Mgha TOP
Corg %
Cing %
Region
Country
Location
Station
Lat
Lon
Water Depth
Tt AV gDwm2
Tt BW gDwm2
SfAV gDwm2
SfBW gDwm2
HwAV gDwm2
HwBw gDwm2
TtL
TtW
#Leave
SfL
HwL
TtD
SfD
HwD
TtvC
HwC
SfC
MaC
IAF
Temp
OD
SAL
NO3+NO2
NH4+
SRP
SRS
Cla
TRIX
Meadow
Corg Mgha TOP
Cing Mgha TOP
Corg %
Cing %
Region
Country
Location
Station
Lat
Lon
Water Depth
Tt AV gDwm2
Tt BW gDwm2
SfAV gDwm2
SfBW gDwm2
HwAV gDwm2
HwBw gDwm2
TtL
TtW
#Leave
SfL
HwL
TtD
SfD
HwD
TtvC
HwC
SfC
MaC
IAF
Temp
OD
SAL
NO3+NO2
NH4+
SRP
SRS
Cla
TRIX
Meadow
Corg Mgha TOP
Cing Mgha TOP
Corg %
Cing %
Region
Country
Location
Station
Lat
Lon
Water Depth
Tt AV gDwm2
Tt BW gDwm2
SfAV gDwm2
SfBW gDwm2
HwAV gDwm2
HwBw gDwm2
TtL
TtW
#Leave
SfL
HwL
TtD
SfD
HwD
TtvC
HwC
SfC
MaC
IAF
Temp
OD
SAL
NO3+NO2
NH4+
SRP
SRS
Cla
TRIX
Meadow
Corg Mgha TOP
Cing Mgha TOP
Corg %
Cing %
Region
Country
Location
Station
Lat
Lon
Water Depth
Tt AV gDwm2
Tt BW gDwm2
SfAV gDwm2
SfBW gDwm2
HwAV gDwm2
HwBw gDwm2
TtL
TtW
#Leave
SfL
HwL
TtD
SfD
HwD
TtvC
HwC
SfC
MaC
IAF
Temp
OD
SAL
NO3+NO2
NH4+
SRP
SRS
Cla
TRIX
Meadow
Corg Mgha TOP
Cing Mgha TOP
Corg %
Cing %
Region
Country
Location
Station
Lat
Lon
Water Depth
Tt AV gDwm2
Tt BW gDwm2
SfAV gDwm2
SfBW gDwm2
HwAV gDwm2
HwBw gDwm2
TtL
TtW
#Leave
SfL
HwL
TtD
SfD
HwD
TtvC
HwC
SfC
MaC
IAF
Temp
OD
SAL
NO3+NO2
NH4+
SRP
SRS
Cla
TRIX
Meadow
Corg Mgha TOP
Cing Mgha TOP
Corg %
Cing %
Region
Country
Location
Station
Lat
Lon
Water Depth
Tt AV gDwm2
Tt BW gDwm2
SfAV gDwm2
SfBW gDwm2
HwAV gDwm2
HwBw gDwm2
TtL
TtW
#Leave
SfL
HwL
TtD
SfD
HwD
TtvC
HwC
SfC
MaC
IAF
Temp
OD
SAL
NO3+NO2
NH4+
SRP
SRS
Cla
TRIX
Meadow
Corg Mgha TOP
Cing Mgha TOP
Corg %
Cing %
Region
Country
Location
Station
Lat
Lon
Water Depth
Tt AV gDwm2
Tt BW gDwm2
SfAV gDwm2
SfBW gDwm2
HwAV gDwm2
HwBw gDwm2
TtL
TtW
#Leave
SfL
HwL
TtD
SfD
HwD
TtvC
HwC
SfC
MaC
IAF
Temp
OD
SAL
NO3+NO2
NH4+
SRP
SRS
Cla
TRIX
Meadow
Corg Mgha TOP
Cing Mgha TOP
Corg %
Cing %
Region
Country
Location
Station
Lat
Lon
Water Depth
Tt AV gDwm2
Tt BW gDwm2
SfAV gDwm2
SfBW gDwm2
HwAV gDwm2
HwBw gDwm2
TtL
TtW
#Leave
SfL
HwL
TtD
SfD
HwD
TtvC
HwC
SfC
MaC
IAF
Temp
OD
SAL
NO3+NO2
NH4+
SRP
SRS
Cla
TRIX
Meadow
Corg Mgha TOP
Cing Mgha TOP
Corg %
Cing %
Region
Country
Location
Station
Lat
Lon
Water Depth
Tt AV gDwm2
Tt BW gDwm2
SfAV gDwm2
SfBW gDwm2
HwAV gDwm2
HwBw gDwm2
TtL
TtW
#Leave
SfL
HwL
TtD
SfD
HwD
TtvC
HwC
SfC
MaC
IAF
Temp
OD
SAL
NO3+NO2
NH4+
SRP
SRS
Cla
TRIX
Meadow
Corg Mgha TOP
Cing Mgha TOP
Corg %
Cing %
Region
Country
Location
Station
Lat
Lon
Water Depth
Tt AV gDwm2
Tt BW gDwm2
SfAV gDwm2
SfBW gDwm2
HwAV gDwm2
HwBw gDwm2
TtL
TtW
#Leave
SfL
HwL
TtD
SfD
HwD
TtvC
HwC
SfC
MaC
IAF
Temp
OD
SAL
NO3+NO2
NH4+
SRP
SRS
Cla
TRIX
Meadow
Corg Mgha TOP
Cing Mgha TOP
Corg %
Cing %
Region
Country
Location
Station
Lat
Lon
Water Depth
Tt AV gDwm2
Tt BW gDwm2
SfAV gDwm2
SfBW gDwm2
HwAV gDwm2
HwBw gDwm2
TtL
TtW
#Leave
SfL
HwL
TtD
SfD
HwD
TtvC
HwC
SfC
MaC
IAF
Temp
OD
SAL
NO3+NO2
NH4+
SRP
SRS
Cla
TRIX
Meadow
Corg Mgha TOP
Cing Mgha TOP
Corg %
Cing %
Region
Country
Location
Station
Lat
Lon
Water Depth
Tt AV gDwm2
Tt BW gDwm2
SfAV gDwm2
SfBW gDwm2
HwAV gDwm2
HwBw gDwm2
TtL
TtW
#Leave
SfL
HwL
TtD
SfD
HwD
TtvC
HwC
SfC
MaC
IAF
Temp
OD
SAL
NO3+NO2
NH4+
SRP
SRS
Cla
TRIX
Meadow
Corg Mgha TOP
Cing Mgha TOP
Corg %
Cing %
Region
Country
Location
Station
Lat
Lon
Water Depth
Tt AV gDwm2
Tt BW gDwm2
SfAV gDwm2
SfBW gDwm2
HwAV gDwm2
HwBw gDwm2
TtL
TtW
#Leave
SfL
HwL
TtD
SfD
HwD
TtvC
HwC
SfC
MaC
IAF
Temp
OD
SAL
NO3+NO2
NH4+
SRP
SRS
Cla
TRIX
Meadow
Corg Mgha TOP
Cing Mgha TOP
Corg %
Cing %
Region
Country
Location
Station
Lat
Lon
Water Depth
Tt AV gDwm2
Tt BW gDwm2
SfAV gDwm2
SfBW gDwm2
HwAV gDwm2
HwBw gDwm2
TtL
TtW
#Leave
SfL
HwL
TtD
SfD
HwD
TtvC
HwC
SfC
MaC
IAF
Temp
OD
SAL
NO3+NO2
NH4+
SRP
SRS
Cla
TRIX
Meadow
Corg Mgha TOP
Cing Mgha TOP
Corg %
Cing %
Region
Country
Location
Station
Lat
Lon
Water Depth
Tt AV gDwm2
Tt BW gDwm2
SfAV gDwm2
SfBW gDwm2
HwAV gDwm2
HwBw gDwm2
TtL
TtW
#Leave
SfL
HwL
TtD
SfD
HwD
TtvC
HwC
SfC
MaC
IAF
Temp
OD
SAL
NO3+NO2
NH4+
SRP
SRS
Cla
TRIX
Meadow
Corg Mgha TOP
Cing Mgha TOP
Corg %
Cing %
Region
Country
Location
Station
Lat
Lon
Water Depth
Tt AV gDwm2
Tt BW gDwm2
SfAV gDwm2
SfBW gDwm2
HwAV gDwm2
HwBw gDwm2
TtL
TtW
#Leave
SfL
HwL
TtD
SfD
HwD
TtvC
HwC
SfC
MaC
IAF
Temp
OD
SAL
NO3+NO2
NH4+
SRP
SRS
Cla
TRIX
Meadow
Corg Mgha TOP
Cing Mgha TOP
Corg %
Cing %
Region
Country
Location
Station
Lat
Lon
Water Depth
Tt AV gDwm2
Tt BW gDwm2
SfAV gDwm2
SfBW gDwm2
HwAV gDwm2
HwBw gDwm2
TtL
TtW
#Leave
SfL
HwL
TtD
SfD
HwD
TtvC
HwC
SfC
MaC
IAF
Temp
OD
SAL
NO3+NO2
NH4+
SRP
SRS
Cla
TRIX
Meadow
Corg Mgha TOP
Cing Mgha TOP
Corg %
Cing %
Region
Country
Location
Station
Lat
Lon
Water Depth
Tt AV gDwm2
Tt BW gDwm2
SfAV gDwm2
SfBW gDwm2
HwAV gDwm2
HwBw gDwm2
TtL
TtW
#Leave
SfL
HwL
TtD
SfD
HwD
TtvC
HwC
SfC
MaC
IAF
Temp
OD
SAL
NO3+NO2
NH4+
SRP
SRS
Cla
TRIX
Meadow
Corg Mgha TOP
Cing Mgha TOP
Corg %
Cing %
Region
Country
Location
Station
Lat
Lon
Water Depth
Tt AV gDwm2
Tt BW gDwm2
SfAV gDwm2
SfBW gDwm2
HwAV gDwm2
HwBw gDwm2
TtL
TtW
#Leave
SfL
HwL
TtD
SfD
HwD
TtvC
HwC
SfC
MaC
IAF
Temp
OD
SAL
NO3+NO2
NH4+
SRP
SRS
Cla
TRIX
Meadow
Corg Mgha TOP
Cing Mgha TOP
Corg %
Cing %
Region
Country
Location
Station
Lat
Lon
Water Depth
Tt AV gDwm2
Tt BW gDwm2
SfAV gDwm2
SfBW gDwm2
HwAV gDwm2
HwBw gDwm2
TtL
TtW
#Leave
SfL
HwL
TtD
SfD
HwD
TtvC
HwC
SfC
MaC
IAF
Temp
OD
SAL
NO3+NO2
NH4+
SRP
SRS
Cla
TRIX
Meadow
Corg Mgha TOP
Cing Mgha TOP
Corg %
Cing %
Region
Country
Location
Station
Lat
Lon
Water Depth
Tt AV gDwm2
Tt BW gDwm2
SfAV gDwm2
SfBW gDwm2
HwAV gDwm2
HwBw gDwm2
TtL
TtW
#Leave
SfL
HwL
TtD
SfD
HwD
TtvC
HwC
SfC
MaC
IAF
Temp
OD
SAL
NO3+NO2
NH4+
SRP
SRS
Cla
TRIX
Meadow
Corg Mgha TOP
Cing Mgha TOP
Corg %
Cing %
Region
Country
Location
Station
Lat
Lon
Water Depth
Tt AV gDwm2
Tt BW gDwm2
SfAV gDwm2
SfBW gDwm2
HwAV gDwm2
HwBw gDwm2
TtL
TtW
#Leave
SfL
HwL
TtD
SfD
HwD
TtvC
HwC
SfC
MaC
IAF
Temp
OD
SAL
NO3+NO2
NH4+
SRP
SRS
Cla
TRIX
Meadow
Corg Mgha TOP
Cing Mgha TOP
Corg %
Cing %
Region
Country
Location
Station
Lat
Lon
Water Depth
Tt AV gDwm2
Tt BW gDwm2
SfAV gDwm2
SfBW gDwm2
HwAV gDwm2
HwBw gDwm2
TtL
TtW
#Leave
SfL
HwL
TtD
SfD
HwD
TtvC
HwC
SfC
MaC
IAF
Temp
OD
SAL
NO3+NO2
NH4+
SRP
SRS
Cla
TRIX
Meadow
Corg Mgha TOP
Cing Mgha TOP
Corg %
Cing %
Region
Country
Location
Station
Lat
Lon
Water Depth
Tt AV gDwm2
Tt BW gDwm2
SfAV gDwm2
SfBW gDwm2
HwAV gDwm2
HwBw gDwm2
TtL
TtW
#Leave
SfL
HwL
TtD
SfD
HwD
TtvC
HwC
SfC
MaC
IAF
Temp
OD
SAL
NO3+NO2
NH4+
SRP
SRS
Cla
TRIX
Meadow
Corg Mgha TOP
Cing Mgha TOP
Corg %
Cing %
Region
Country
Location
Station
Lat
Lon
Water Depth
Tt AV gDwm2
Tt BW gDwm2
SfAV gDwm2
SfBW gDwm2
HwAV gDwm2
HwBw gDwm2
TtL
TtW
#Leave
SfL
HwL
TtD
SfD
HwD
TtvC
HwC
SfC
MaC
IAF
Temp
OD
SAL
NO3+NO2
NH4+
SRP
SRS
Cla
TRIX
Meadow
Corg Mgha TOP
Cing Mgha TOP
Corg %
Cing %
Region
Country
Location
Station
Lat
Lon
Water Depth
Tt AV gDwm2
Tt BW gDwm2
SfAV gDwm2
SfBW gDwm2
HwAV gDwm2
HwBw gDwm2
TtL
TtW
#Leave
SfL
HwL
TtD
SfD
HwD
TtvC
HwC
SfC
MaC
IAF
Temp
OD
SAL
NO3+NO2
NH4+
SRP
SRS
Cla
TRIX
Meadow
Corg Mgha TOP
Cing Mgha TOP
Corg %
Cing %
Region
Country
Location
Station
Lat
Lon
Water Depth
Tt AV gDwm2
Tt BW gDwm2
SfAV gDwm2
SfBW gDwm2
HwAV gDwm2
HwBw gDwm2
TtL
TtW
#Leave
SfL
HwL
TtD
SfD
HwD
TtvC
HwC
SfC
MaC
IAF
Temp
OD
SAL
NO3+NO2
NH4+
SRP
SRS
Cla
TRIX
Meadow
Corg Mgha TOP
Cing Mgha TOP
Corg %
Cing %
Region
Country
Location
Station
Lat
Lon
Water Depth
Tt AV gDwm2
Tt BW gDwm2
SfAV gDwm2
SfBW gDwm2
HwAV gDwm2
HwBw gDwm2
TtL
TtW
#Leave
SfL
HwL
TtD
SfD
HwD
TtvC
HwC
SfC
MaC
IAF
Temp
OD
SAL
NO3+NO2
NH4+
SRP
SRS
Cla
TRIX
Meadow
Corg Mgha TOP
Cing Mgha TOP
Corg %
Cing %
Region
Country
Location
Station
Lat
Lon
Water Depth
Tt AV gDwm2
Tt BW gDwm2
SfAV gDwm2
SfBW gDwm2
HwAV gDwm2
HwBw gDwm2
TtL
TtW
#Leave
SfL
HwL
TtD
SfD
HwD
TtvC
HwC
SfC
MaC
IAF
Temp
OD
SAL
NO3+NO2
NH4+
SRP
SRS
Cla
TRIX
Meadow
Corg Mgha TOP
Cing Mgha TOP
Corg %
Cing %
Region
Country
Location
Station
Lat
Lon
Water Depth
Tt AV gDwm2
Tt BW gDwm2
SfAV gDwm2
SfBW gDwm2
HwAV gDwm2
HwBw gDwm2
TtL
TtW
#Leave
SfL
HwL
TtD
SfD
HwD
TtvC
HwC
SfC
MaC
IAF
Temp
OD
SAL
NO3+NO2
NH4+
SRP
SRS
Cla
TRIX
Meadow
Corg Mgha TOP
Cing Mgha TOP
Corg %
Cing %
Region
Country
Location
Station
Lat
Lon
Water Depth
Tt AV gDwm2
Tt BW gDwm2
SfAV gDwm2
SfBW gDwm2
HwAV gDwm2
HwBw gDwm2
TtL
TtW
#Leave
SfL
HwL
TtD
SfD
HwD
TtvC
HwC
SfC
MaC
IAF
Temp
OD
SAL
NO3+NO2
NH4+
SRP
SRS
Cla
TRIX
Meadow
Corg Mgha TOP
Cing Mgha TOP
Corg %
Cing %
Region
Country
Location
Station
Lat
Lon
Water Depth
Tt AV gDwm2
Tt BW gDwm2
SfAV gDwm2
SfBW gDwm2
HwAV gDwm2
HwBw gDwm2
TtL
TtW
#Leave
SfL
HwL
TtD
SfD
HwD
TtvC
HwC
SfC
MaC
IAF
Temp
OD
SAL
NO3+NO2
NH4+
SRP
SRS
Cla
TRIX
Meadow
Corg Mgha TOP
Cing Mgha TOP
Corg %
Cing %
Region
Country
Location
Station
Lat
Lon
Water Depth
Tt AV gDwm2
Tt BW gDwm2
SfAV gDwm2
SfBW gDwm2
HwAV gDwm2
HwBw gDwm2
TtL
TtW
#Leave
SfL
HwL
TtD
SfD
HwD
TtvC
HwC
SfC
MaC
IAF
Temp
OD
SAL
NO3+NO2
NH4+
SRP
SRS
Cla
TRIX
Meadow
Corg Mgha TOP
Cing Mgha TOP
Corg %
Cing %
Region
Country
Location
Station
Lat
Lon
Water Depth
Tt AV gDwm2
Tt BW gDwm2
SfAV gDwm2
SfBW gDwm2
HwAV gDwm2
HwBw gDwm2
TtL
TtW
#Leave
SfL
HwL
TtD
SfD
HwD
TtvC
HwC
SfC
MaC
IAF
Temp
OD
SAL
NO3+NO2
NH4+
SRP
SRS
Cla
TRIX
Meadow
Corg Mgha TOP
Cing Mgha TOP
Corg %
Cing %
Region
Country
Location
Station
Lat
Lon
Water Depth
Tt AV gDwm2
Tt BW gDwm2
SfAV gDwm2
SfBW gDwm2
HwAV gDwm2
HwBw gDwm2
TtL
TtW
#Leave
SfL
HwL
TtD
SfD
HwD
TtvC
HwC
SfC
MaC
IAF
Temp
OD
SAL
NO3+NO2
NH4+
SRP
SRS
Cla
TRIX
Meadow
Corg Mgha TOP
Cing Mgha TOP
Corg %
Cing %
Region
Country
Location
Station
Lat
Lon
Water Depth
Tt AV gDwm2
Tt BW gDwm2
SfAV gDwm2
SfBW gDwm2
HwAV gDwm2
HwBw gDwm2
TtL
TtW
#Leave
SfL
HwL
TtD
SfD
HwD
TtvC
HwC
SfC
MaC
IAF
Temp
OD
SAL
NO3+NO2
NH4+
SRP
SRS
Cla
TRIX
Meadow
Corg Mgha TOP
Cing Mgha TOP
Corg %
Cing %
Region
Country
Location
Station
Lat
Lon
Water Depth
Tt AV gDwm2
Tt BW gDwm2
SfAV gDwm2
SfBW gDwm2
HwAV gDwm2
HwBw gDwm2
TtL
TtW
#Leave
SfL
HwL
TtD
SfD
HwD
TtvC
HwC
SfC
MaC
IAF
Temp
OD
SAL
NO3+NO2
NH4+
SRP
SRS
Cla
TRIX
Meadow
Corg Mgha TOP
Cing Mgha TOP
Corg %
Cing %
Region
Country
Location
Station
Lat
Lon
Water Depth
Tt AV gDwm2
Tt BW gDwm2
SfAV gDwm2
SfBW gDwm2
HwAV gDwm2
HwBw gDwm2
TtL
TtW
#Leave
SfL
HwL
TtD
SfD
HwD
TtvC
HwC
SfC
MaC
IAF
Temp
OD
SAL
NO3+NO2
NH4+
SRP
SRS
Cla
TRIX
Meadow
Corg Mgha TOP
Cing Mgha TOP
Corg %
Cing %
Region
Country
Location
Station
Lat
Lon
Water Depth
Tt AV gDwm2
Tt BW gDwm2
SfAV gDwm2
SfBW gDwm2
HwAV gDwm2
HwBw gDwm2
TtL
TtW
#Leave
SfL
HwL
TtD
SfD
HwD
TtvC
HwC
SfC
MaC
IAF
Temp
OD
SAL
NO3+NO2
NH4+
SRP
SRS
Cla
TRIX
Meadow
Corg Mgha TOP
Cing Mgha TOP
Corg %
Cing %
Region
Country
Location
Station
Lat
Lon
Water Depth
Tt AV gDwm2
Tt BW gDwm2
SfAV gDwm2
SfBW gDwm2
HwAV gDwm2
HwBw gDwm2
TtL
TtW
#Leave
SfL
HwL
TtD
SfD
HwD
TtvC
HwC
SfC
MaC
IAF
Temp
OD
SAL
NO3+NO2
NH4+
SRP
SRS
Cla
TRIX
Meadow
Corg Mgha TOP
Cing Mgha TOP
Corg %
Cing %
Region
Country
Location
Station
Lat
Lon
Water Depth
Tt AV gDwm2
Tt BW gDwm2
SfAV gDwm2
SfBW gDwm2
HwAV gDwm2
HwBw gDwm2
TtL
TtW
#Leave
SfL
HwL
TtD
SfD
HwD
TtvC
HwC
SfC
MaC
IAF
Temp
OD
SAL
NO3+NO2
NH4+
SRP
SRS
Cla
TRIX
Meadow
Corg Mgha TOP
Cing Mgha TOP
Corg %
Cing %
Region
Country
Location
Station
Lat
Lon
Water Depth
Tt AV gDwm2
Tt BW gDwm2
SfAV gDwm2
SfBW gDwm2
HwAV gDwm2
HwBw gDwm2
TtL
TtW
#Leave
SfL
HwL
TtD
SfD
HwD
TtvC
HwC
SfC
MaC
IAF
Temp
OD
SAL
[truncated: 571 more rows]
